# Supplementary material for: Dichotomies in microwave-assisted propargyl-isomerization–Claisen domino sequences dependent on base strengths
Source: Royal Society of Chemistry journal article supplement (doi:10.1039/b714351f), 2007-12-17
Supplement: b714351f.pdf [file b714351f.pdf]

# **Dichotomies in microwave-assisted propargyl– isomerization–Claisen domino sequences dependent on base strengths**

Daniel M. D'Souza,<sup>a</sup> Wei–Wei Liao,<sup>a</sup> Frank Rominger,<sup>a,§</sup> and Thomas J. J. Müller\*<sup>a,b</sup>

<sup>a</sup>Organisch-Chemisches Institut, Ruprecht-Karls-Universität Heidelberg, Im Neuenheimer Feld  
270, 69121 Heidelberg, Germany.

<sup>b</sup>New address: Institut für Organische Chemie und Makromolekulare Chemie, Heinrich-Heine-  
Universität Düsseldorf, Universitätsstrasse 1, 40225 Düsseldorf, Germany. Fax: +221 81 12298;  
Tel: +221 81 14324; E-mail: ThomasJJ.Mueller@uni-duesseldorf.de

## **Supporting Information**

### **Table of Contents:**

|                                                                    |            |
|--------------------------------------------------------------------|------------|
| <b>I. X-Ray structure data of 2a, 2c, 11e, and 11f</b>             | <b>S2</b>  |
| <b>II. Computational Studies on the intermediates and products</b> | <b>S28</b> |

## I. X-Ray structure data of 2a, 2c, 11e, and 11f

### 6-Benzhydrylidene-8-(4-nitro-phenyl)-tricyclo[3.2.1.0<sup>2,7</sup>]oct-3-en-1-yl]-phenyl-methanone (2a)

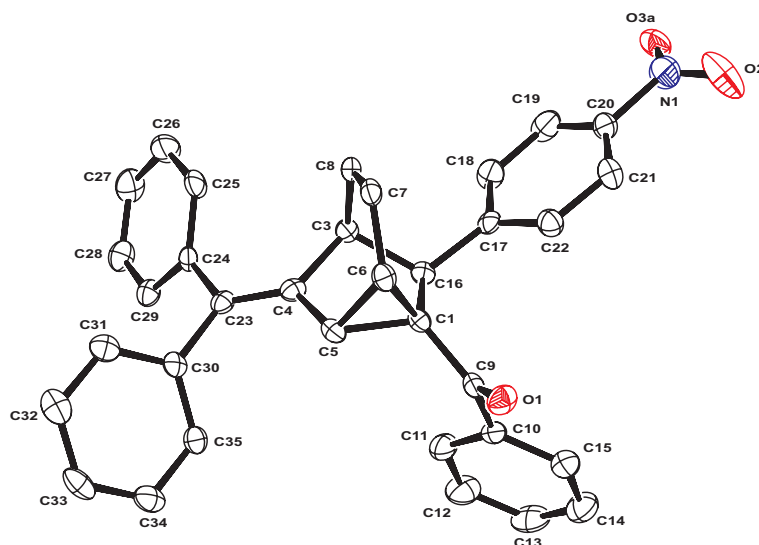

Table 1: Crystal data and structure refinement for **2a**.

|                                   |                                                 |                     |
|-----------------------------------|-------------------------------------------------|---------------------|
| Empirical formula                 | C <sub>37</sub> H <sub>31</sub> NO <sub>4</sub> |                     |
| Formula weight                    | 553.63                                          |                     |
| Temperature                       | 100(2) K                                        |                     |
| Wavelength                        | 0.71073 Å                                       |                     |
| Crystal system                    | monoclinic                                      |                     |
| Space group                       | P2 <sub>1</sub> /c                              |                     |
| Z                                 | 4                                               |                     |
| Unit cell dimensions              | a = 15.348(2) Å                                 | α = 90.0 deg.       |
|                                   | b = 8.806(1) Å                                  | β = 109.831(3) deg. |
|                                   | c = 22.612(4) Å                                 | γ = 90.0 deg.       |
| Volume                            | 2874.9(7) Å <sup>3</sup>                        |                     |
| Density (calculated)              | 1.28 g/cm <sup>3</sup>                          |                     |
| Absorption coefficient            | 0.08 mm <sup>-1</sup>                           |                     |
| Crystal shape                     | irregular                                       |                     |
| Crystal size                      | 0.43 x 0.065 x 0.04 mm <sup>3</sup>             |                     |
| Theta range for data collection   | 2.5 to 22.0 deg.                                |                     |
| Index ranges                      | -16 ≤ h ≤ 16, -9 ≤ k ≤ 9, -23 ≤ l ≤ 23          |                     |
| Reflections collected             | 16360                                           |                     |
| Independent reflections           | 3488 (R(int) = 0.0536)                          |                     |
| Observed reflections              | 2697 (I > 2σ(I))                                |                     |
| Absorption correction             | semi-empirical from equivalents                 |                     |
| Max. and min. transmission        | 0.99 and 0.98                                   |                     |
| Refinement method                 | Full-matrix least-squares on F <sup>2</sup>     |                     |
| Data/restraints/parameters        | 3488 / 0 / 509                                  |                     |
| Goodness-of-fit on F <sup>2</sup> | 1.04                                            |                     |
| Final R indices (I > 2σ(I))       | R1 = 0.048, wR2 = 0.107                         |                     |
| Largest diff. peak and hole       | 0.54 and -0.59 eÅ <sup>-3</sup>                 |                     |

Table 2: Atomic coordinates and equivalent isotropic displacement parameters (Å<sup>2</sup>) for **2a**. U<sub>eq</sub> is defined as one third of the trace of the orthogonalized U<sub>ij</sub> tensor.

| Atom | x | y | z | U <sub>eq</sub> |
|------|---|---|---|-----------------|
|------|---|---|---|-----------------|

|      |            |            |           |            |
|------|------------|------------|-----------|------------|
| O1   | 0.0267(1)  | 0.2994(2)  | 0.5058(1) | 0.0258(5)  |
| O2   | 0.3837(2)  | -0.2924(3) | 0.6161(2) | 0.0610(8)  |
| O3   | 0.4813(5)  | -0.2290(7) | 0.6948(3) | 0.0525(16) |
| O3A  | 0.5199(4)  | -0.1722(6) | 0.6778(3) | 0.0353(13) |
| N1   | 0.4250(2)  | -0.1875(4) | 0.6488(2) | 0.0536(9)  |
| C1   | 0.1420(2)  | 0.3945(3)  | 0.5974(1) | 0.0175(6)  |
| C3   | 0.2564(2)  | 0.4570(3)  | 0.6971(1) | 0.0178(7)  |
| C4   | 0.1821(2)  | 0.5802(3)  | 0.6813(1) | 0.0188(7)  |
| C5   | 0.1035(2)  | 0.5152(3)  | 0.6310(1) | 0.0196(7)  |
| C6   | 0.0884(2)  | 0.3450(3)  | 0.6399(1) | 0.0196(7)  |
| C7   | 0.1415(2)  | 0.2787(3)  | 0.7014(1) | 0.0197(7)  |
| C8   | 0.2248(2)  | 0.3341(3)  | 0.7317(1) | 0.0193(7)  |
| C9   | 0.0973(2)  | 0.3745(3)  | 0.5279(1) | 0.0199(7)  |
| C10  | 0.1408(2)  | 0.4484(3)  | 0.4857(1) | 0.0204(7)  |
| C11  | 0.1847(2)  | 0.5886(3)  | 0.4998(2) | 0.0291(8)  |
| C12  | 0.2206(2)  | 0.6568(4)  | 0.4579(2) | 0.0378(9)  |
| C13  | 0.2145(2)  | 0.5853(4)  | 0.4024(2) | 0.0396(9)  |
| C14  | 0.1716(2)  | 0.4462(4)  | 0.3876(2) | 0.0352(8)  |
| C15  | 0.1345(2)  | 0.3776(4)  | 0.4290(1) | 0.0274(8)  |
| C16  | 0.2464(2)  | 0.3928(3)  | 0.6301(1) | 0.0179(7)  |
| C17  | 0.2930(2)  | 0.2399(3)  | 0.6322(1) | 0.0186(7)  |
| C18  | 0.3857(2)  | 0.2228(4)  | 0.6681(1) | 0.0285(8)  |
| C19  | 0.4299(2)  | 0.0843(4)  | 0.6742(2) | 0.0345(9)  |
| C20  | 0.3799(2)  | -0.0377(4) | 0.6414(1) | 0.0309(8)  |
| C21  | 0.2891(2)  | -0.0256(4) | 0.6041(2) | 0.0297(8)  |
| C22  | 0.2453(2)  | 0.1140(3)  | 0.5999(1) | 0.0240(7)  |
| C23  | 0.1846(2)  | 0.7164(3)  | 0.7090(1) | 0.0182(7)  |
| C24  | 0.2657(2)  | 0.7723(3)  | 0.7617(1) | 0.0187(7)  |
| C25  | 0.3165(2)  | 0.6786(4)  | 0.8112(1) | 0.0262(7)  |
| C26  | 0.3931(2)  | 0.7325(4)  | 0.8590(2) | 0.0356(9)  |
| C27  | 0.4213(2)  | 0.8815(4)  | 0.8580(2) | 0.0362(9)  |
| C28  | 0.3715(2)  | 0.9769(4)  | 0.8101(1) | 0.0295(8)  |
| C29  | 0.2942(2)  | 0.9237(3)  | 0.7630(1) | 0.0237(7)  |
| C30  | 0.1027(2)  | 0.8224(3)  | 0.6874(1) | 0.0180(7)  |
| C31  | 0.0576(2)  | 0.8647(3)  | 0.7291(2) | 0.0239(7)  |
| C32  | -0.0182(2) | 0.9610(3)  | 0.7107(2) | 0.0281(8)  |
| C33  | -0.0495(2) | 1.0190(3)  | 0.6502(2) | 0.0280(8)  |
| C34  | -0.0052(2) | 0.9798(3)  | 0.6084(2) | 0.0277(8)  |
| C35  | 0.0696(2)  | 0.8822(3)  | 0.6268(1) | 0.0225(7)  |
| O50  | 0.5830(5)  | 0.8589(7)  | 0.6076(3) | 0.092(2)   |
| C50  | 0.6140(6)  | 0.8271(8)  | 0.5646(5) | 0.0449(19) |
| C51  | 0.6943(7)  | 0.9148(11) | 0.5623(5) | 0.072(2)   |
| O50A | 0.4930(5)  | 0.9416(7)  | 0.5343(3) | 0.085(2)   |
| C50A | 0.5503(8)  | 0.8594(10) | 0.5298(4) | 0.055(2)   |
| C51A | 0.6291(7)  | 0.9211(11) | 0.5177(5) | 0.072(2)   |
| C52  | 0.5653(4)  | 0.6986(5)  | 0.5273(2) | 0.126(3)   |

Table 3: Hydrogen coordinates and isotropic displacement parameters ( $\text{\AA}^2$ ) for **2a**.

| Atom | x          | y        | z          | $U_{\text{eq}}$ |
|------|------------|----------|------------|-----------------|
| H3   | 0.3186(18) | 0.494(3) | 0.7201(11) | 0.010(6)        |
| H5   | 0.0496(18) | 0.573(3) | 0.6091(12) | 0.012(7)        |
| H6   | 0.029(2)   | 0.311(3) | 0.6168(12) | 0.019(7)        |
| H7   | 0.1174(19) | 0.200(3) | 0.7195(13) | 0.026(8)        |
| H8   | 0.2646(18) | 0.300(3) | 0.7733(13) | 0.020(7)        |
| H11  | 0.1908(18) | 0.640(3) | 0.5382(14) | 0.023(8)        |
| H12  | 0.252(2)   | 0.755(4) | 0.4688(15) | 0.043(9)        |
| H13  | 0.238(2)   | 0.632(3) | 0.3720(15) | 0.038(9)        |

|      |             |           |            |          |
|------|-------------|-----------|------------|----------|
| H14  | 0.168(2)    | 0.388(3)  | 0.3455(15) | 0.038(8) |
| H15  | 0.103(2)    | 0.282(3)  | 0.4202(13) | 0.029(8) |
| H16  | 0.2751(16)  | 0.466(3)  | 0.6118(11) | 0.004(6) |
| H18  | 0.420(2)    | 0.305(3)  | 0.6897(13) | 0.026(8) |
| H19  | 0.492(2)    | 0.071(3)  | 0.7000(15) | 0.041(9) |
| H21  | 0.258(2)    | -0.114(4) | 0.5813(14) | 0.032(8) |
| H22  | 0.178(2)    | 0.122(3)  | 0.5748(14) | 0.032(8) |
| H25  | 0.2955(18)  | 0.581(3)  | 0.8122(12) | 0.022(8) |
| H26  | 0.427(2)    | 0.669(3)  | 0.8926(14) | 0.028(8) |
| H27  | 0.476(2)    | 0.917(4)  | 0.8905(15) | 0.041(9) |
| H28  | 0.3909(19)  | 1.085(3)  | 0.8089(13) | 0.028(8) |
| H29  | 0.2569(19)  | 0.992(3)  | 0.7287(13) | 0.022(7) |
| H31  | 0.0793(18)  | 0.822(3)  | 0.7710(14) | 0.026(8) |
| H32  | -0.050(2)   | 0.984(3)  | 0.7395(14) | 0.033(9) |
| H33  | -0.1021(19) | 1.087(3)  | 0.6371(12) | 0.019(7) |
| H34  | -0.027(2)   | 1.023(3)  | 0.5659(16) | 0.040(9) |
| H35  | 0.0974(19)  | 0.849(3)  | 0.5974(13) | 0.024(8) |
| H51A | 0.7123      | 0.8794    | 0.5270     | 0.109    |
| H51B | 0.7462      | 0.9008    | 0.6016     | 0.109    |
| H51C | 0.6780      | 1.0227    | 0.5566     | 0.109    |
| H51D | 0.6268      | 1.0322    | 0.5189     | 0.109    |
| H51E | 0.6282      | 0.8881    | 0.4761     | 0.109    |
| H51F | 0.6860      | 0.8851    | 0.5498     | 0.109    |
| H52A | 0.5160      | 0.6650    | 0.5428     | 0.189    |
| H52B | 0.6090      | 0.6150    | 0.5308     | 0.189    |
| H52C | 0.5381      | 0.7292    | 0.4831     | 0.189    |

Table 4: Anisotropic displacement parameters ( $\text{\AA}^2$ ) for **2a**. The anisotropic displacement factor exponent takes the form:  $-2 \pi^2 (h^2 a^{*2} U_{11} + \dots + 2 h k a^* b^* U_{12})$

| Atom | Atom       | $U_{11}$   | $U_{22}$   | $U_{33}$    | $U_{23}$   | $U_{13}$    | $U_{12}$ |
|------|------------|------------|------------|-------------|------------|-------------|----------|
| O1   | 0.0257(12) | 0.0261(12) | 0.0224(11) | -0.0030(9)  | 0.0038(9)  | -0.0063(10) |          |
| O2   | 0.0543(17) | 0.0283(15) | 0.106(2)   | 0.0049(16)  | 0.0342(16) | 0.0115(13)  |          |
| O3   | 0.062(4)   | 0.053(4)   | 0.030(3)   | 0.001(3)    | -0.001(3)  | 0.035(3)    |          |
| O3A  | 0.033(3)   | 0.029(3)   | 0.039(3)   | 0.004(2)    | 0.006(3)   | 0.012(2)    |          |
| N1   | 0.066(2)   | 0.052(2)   | 0.037(2)   | -0.0002(17) | 0.0101(18) | 0.040(2)    |          |
| C1   | 0.0189(15) | 0.0132(15) | 0.0205(16) | 0.0007(12)  | 0.0070(13) | -0.0001(12) |          |
| C3   | 0.0161(16) | 0.0175(16) | 0.0186(16) | -0.0011(13) | 0.0042(13) | -0.0008(13) |          |
| C4   | 0.0208(16) | 0.0179(17) | 0.0175(16) | 0.0018(13)  | 0.0060(13) | -0.0038(13) |          |
| C5   | 0.0207(17) | 0.0154(16) | 0.0230(17) | 0.0024(13)  | 0.0077(14) | 0.0029(13)  |          |
| C6   | 0.0193(17) | 0.0155(16) | 0.0241(17) | -0.0027(13) | 0.0075(14) | -0.0027(13) |          |
| C7   | 0.0269(18) | 0.0135(16) | 0.0229(17) | -0.0014(14) | 0.0138(15) | -0.0001(14) |          |
| C8   | 0.0245(18) | 0.0175(16) | 0.0167(17) | -0.0019(13) | 0.0083(14) | 0.0042(13)  |          |
| C9   | 0.0222(17) | 0.0148(15) | 0.0218(17) | -0.0022(13) | 0.0061(13) | 0.0038(14)  |          |
| C10  | 0.0216(16) | 0.0205(17) | 0.0172(16) | 0.0018(13)  | 0.0040(13) | 0.0012(13)  |          |
| C11  | 0.040(2)   | 0.0234(19) | 0.0221(18) | 0.0004(15)  | 0.0078(15) | -0.0042(15) |          |
| C12  | 0.049(2)   | 0.030(2)   | 0.033(2)   | 0.0080(17)  | 0.0122(17) | -0.0096(17) |          |
| C13  | 0.042(2)   | 0.052(2)   | 0.029(2)   | 0.0169(19)  | 0.0172(17) | 0.0022(18)  |          |
| C14  | 0.037(2)   | 0.045(2)   | 0.026(2)   | 0.0009(17)  | 0.0136(16) | 0.0019(17)  |          |
| C15  | 0.0270(17) | 0.0281(19) | 0.0253(19) | -0.0001(15) | 0.0067(14) | 0.0002(15)  |          |
| C16  | 0.0211(16) | 0.0142(16) | 0.0201(16) | 0.0019(13)  | 0.0094(13) | -0.0035(13) |          |
| C17  | 0.0201(16) | 0.0235(17) | 0.0150(15) | 0.0007(13)  | 0.0098(13) | 0.0012(13)  |          |
| C18  | 0.0220(18) | 0.034(2)   | 0.0281(18) | -0.0048(16) | 0.0074(15) | 0.0017(17)  |          |
| C19  | 0.0237(19) | 0.054(2)   | 0.0243(18) | -0.0038(17) | 0.0058(15) | 0.0142(18)  |          |
| C20  | 0.038(2)   | 0.031(2)   | 0.0246(18) | 0.0005(15)  | 0.0123(16) | 0.0188(16)  |          |
| C21  | 0.034(2)   | 0.0230(19) | 0.0329(19) | -0.0032(15) | 0.0128(16) | 0.0062(16)  |          |
| C22  | 0.0228(18) | 0.0234(18) | 0.0258(17) | -0.0006(14) | 0.0083(15) | 0.0023(14)  |          |
| C23  | 0.0214(16) | 0.0184(16) | 0.0159(16) | 0.0009(13)  | 0.0079(12) | -0.0029(13) |          |

|      |            |            |            |             |             |             |
|------|------------|------------|------------|-------------|-------------|-------------|
| C24  | 0.0210(16) | 0.0174(16) | 0.0191(16) | -0.0043(13) | 0.0086(13)  | 0.0017(13)  |
| C25  | 0.0315(18) | 0.0164(18) | 0.0274(19) | -0.0067(15) | 0.0054(15)  | 0.0018(15)  |
| C26  | 0.034(2)   | 0.034(2)   | 0.028(2)   | -0.0038(17) | -0.0034(16) | 0.0072(17)  |
| C27  | 0.0269(19) | 0.040(2)   | 0.035(2)   | -0.0123(18) | 0.0020(17)  | -0.0034(17) |
| C28  | 0.0309(19) | 0.029(2)   | 0.0297(19) | -0.0065(16) | 0.0124(16)  | -0.0071(16) |
| C29  | 0.0268(17) | 0.0226(18) | 0.0226(18) | -0.0040(15) | 0.0096(15)  | -0.0032(14) |
| C30  | 0.0206(16) | 0.0102(15) | 0.0220(17) | -0.0023(13) | 0.0055(13)  | -0.0051(12) |
| C31  | 0.0264(18) | 0.0176(17) | 0.0282(19) | 0.0035(15)  | 0.0100(15)  | -0.0039(14) |
| C32  | 0.0264(18) | 0.0206(18) | 0.043(2)   | 0.0010(16)  | 0.0195(17)  | -0.0031(15) |
| C33  | 0.0207(17) | 0.0142(16) | 0.045(2)   | -0.0009(15) | 0.0053(16)  | 0.0006(14)  |
| C34  | 0.0296(19) | 0.0158(17) | 0.029(2)   | -0.0010(15) | -0.0016(16) | -0.0016(15) |
| C35  | 0.0271(18) | 0.0157(16) | 0.0236(18) | -0.0038(14) | 0.0073(15)  | -0.0019(14) |
| O50  | 0.123(6)   | 0.078(5)   | 0.093(5)   | -0.020(4)   | 0.062(5)    | -0.047(4)   |
| C50  | 0.057(6)   | 0.033(5)   | 0.049(5)   | -0.003(4)   | 0.025(5)    | -0.007(4)   |
| C51  | 0.099(7)   | 0.062(4)   | 0.071(6)   | -0.004(5)   | 0.050(4)    | 0.000(5)    |
| O50A | 0.088(5)   | 0.054(4)   | 0.099(5)   | -0.022(3)   | 0.015(4)    | 0.016(4)    |
| C50A | 0.084(7)   | 0.043(6)   | 0.034(5)   | 0.001(4)    | 0.013(5)    | -0.008(5)   |
| C51A | 0.099(7)   | 0.062(4)   | 0.071(6)   | -0.004(5)   | 0.050(4)    | 0.000(5)    |
| C52  | 0.173(6)   | 0.056(3)   | 0.087(4)   | -0.008(3)   | -0.038(4)   | 0.034(4)    |

Table 5: Bond lengths (Å) and angles (deg) for **2a**.

|         |          |           |           |
|---------|----------|-----------|-----------|
| O1-C9   | 1.222(3) | C18-H18   | 0.93(3)   |
| O2-N1   | 1.218(4) | C19-C20   | 1.381(5)  |
| O3-O3A  | 0.952(6) | C19-H19   | 0.95(3)   |
| O3-N1   | 1.164(6) | C20-C21   | 1.366(4)  |
| O3A-N1  | 1.387(6) | C21-C22   | 1.389(4)  |
| N1-C20  | 1.473(4) | C21-H21   | 0.96(3)   |
| C1-C9   | 1.497(4) | C22-H22   | 1.00(3)   |
| C1-C16  | 1.520(4) | C23-C24   | 1.485(4)  |
| C1-C6   | 1.525(4) | C23-C30   | 1.507(4)  |
| C1-C5   | 1.538(4) | C24-C25   | 1.395(4)  |
| C3-C8   | 1.509(4) | C24-C29   | 1.400(4)  |
| C3-C4   | 1.526(4) | C25-C26   | 1.385(4)  |
| C3-C16  | 1.575(4) | C25-H25   | 0.92(3)   |
| C3-H3   | 0.97(3)  | C26-C27   | 1.385(5)  |
| C4-C23  | 1.348(4) | C26-H26   | 0.95(3)   |
| C4-C5   | 1.466(4) | C27-C28   | 1.378(5)  |
| C5-C6   | 1.541(4) | C27-H27   | 0.96(3)   |
| C5-H5   | 0.95(3)  | C28-C29   | 1.380(4)  |
| C6-C7   | 1.475(4) | C28-H28   | 1.00(3)   |
| C6-H6   | 0.93(3)  | C29-H29   | 1.00(3)   |
| C7-C8   | 1.321(4) | C30-C35   | 1.394(4)  |
| C7-H7   | 0.94(3)  | C30-C31   | 1.396(4)  |
| C8-H8   | 0.98(3)  | C31-C32   | 1.384(4)  |
| C9-C10  | 1.487(4) | C31-H31   | 0.97(3)   |
| C10-C11 | 1.391(4) | C32-C33   | 1.385(4)  |
| C10-C15 | 1.398(4) | C32-H32   | 0.95(3)   |
| C11-C12 | 1.384(4) | C33-C34   | 1.382(5)  |
| C11-H11 | 0.96(3)  | C33-H33   | 0.97(3)   |
| C12-C13 | 1.378(5) | C34-C35   | 1.381(4)  |
| C12-H12 | 0.98(3)  | C34-H34   | 0.98(3)   |
| C13-C14 | 1.378(5) | C35-H35   | 0.95(3)   |
| C13-H13 | 0.96(3)  | O50-C50   | 1.250(9)  |
| C14-C15 | 1.387(4) | C50-C52   | 1.458(9)  |
| C14-H14 | 1.06(3)  | C50-C51   | 1.471(12) |
| C15-H15 | 0.96(3)  | C51-H51A  | 0.9800    |
| C16-C17 | 1.517(4) | C51-H51B  | 0.9800    |
| C16-H16 | 0.95(2)  | C51-H51C  | 0.9800    |
| C17-C18 | 1.386(4) | O50A-C50A | 1.170(11) |
| C17-C22 | 1.391(4) | C50A-C52  | 1.439(10) |
| C18-C19 | 1.380(4) | C50A-C51A | 1.434(13) |

|             |           |             |           |
|-------------|-----------|-------------|-----------|
| C51A-H51D   | 0.9800    | C15-C14-H14 | 119.0(16) |
| C51A-H51E   | 0.9800    | C14-C15-C10 | 120.5(3)  |
| C51A-H51F   | 0.9800    | C14-C15-H15 | 122.5(17) |
| C52-H52A    | 0.9800    | C10-C15-H15 | 117.0(17) |
| C52-H52B    | 0.9800    | C17-C16-C1  | 115.6(2)  |
| C52-H52C    | 0.9800    | C17-C16-C3  | 113.4(2)  |
|             |           | C1-C16-C3   | 101.9(2)  |
| O3A-O3-N1   | 81.3(6)   | C17-C16-H16 | 109.4(14) |
| O3-O3A-N1   | 56.0(5)   | C1-C16-H16  | 110.5(14) |
| O3-N1-O2    | 112.3(5)  | C3-C16-H16  | 105.5(14) |
| O3-N1-O3A   | 42.7(3)   | C18-C17-C22 | 118.3(3)  |
| O2-N1-O3A   | 127.4(3)  | C18-C17-C16 | 119.6(3)  |
| O3-N1-C20   | 124.1(4)  | C22-C17-C16 | 122.2(2)  |
| O2-N1-C20   | 118.8(3)  | C19-C18-C17 | 121.8(3)  |
| O3A-N1-C20  | 110.2(4)  | C19-C18-H18 | 117.5(17) |
| C9-C1-C16   | 122.8(2)  | C17-C18-H18 | 120.7(17) |
| C9-C1-C6    | 118.3(2)  | C18-C19-C20 | 117.9(3)  |
| C16-C1-C6   | 113.3(2)  | C18-C19-H19 | 122.2(19) |
| C9-C1-C5    | 119.0(2)  | C20-C19-H19 | 119.9(19) |
| C16-C1-C5   | 106.6(2)  | C21-C20-C19 | 122.4(3)  |
| C6-C1-C5    | 60.39(18) | C21-C20-N1  | 118.8(3)  |
| C8-C3-C4    | 106.5(2)  | C19-C20-N1  | 118.8(3)  |
| C8-C3-C16   | 107.3(2)  | C20-C21-C22 | 118.7(3)  |
| C4-C3-C16   | 102.1(2)  | C20-C21-H21 | 118.8(18) |
| C8-C3-H3    | 113.1(14) | C22-C21-H21 | 122.4(18) |
| C4-C3-H3    | 113.9(14) | C21-C22-C17 | 120.8(3)  |
| C16-C3-H3   | 113.1(14) | C21-C22-H22 | 119.2(17) |
| C23-C4-C5   | 126.4(3)  | C17-C22-H22 | 119.9(16) |
| C23-C4-C3   | 128.6(2)  | C4-C23-C24  | 123.4(2)  |
| C5-C4-C3    | 104.9(2)  | C4-C23-C30  | 120.8(2)  |
| C4-C5-C1    | 107.4(2)  | C24-C23-C30 | 115.8(2)  |
| C4-C5-C6    | 113.5(2)  | C25-C24-C29 | 117.4(3)  |
| C1-C5-C6    | 59.41(18) | C25-C24-C23 | 122.4(3)  |
| C4-C5-H5    | 122.3(15) | C29-C24-C23 | 120.2(2)  |
| C1-C5-H5    | 121.6(15) | C26-C25-C24 | 121.3(3)  |
| C6-C5-H5    | 116.5(15) | C26-C25-H25 | 120.8(17) |
| C7-C6-C1    | 117.7(2)  | C24-C25-H25 | 117.8(17) |
| C7-C6-C5    | 116.7(2)  | C25-C26-C27 | 119.9(3)  |
| C1-C6-C5    | 60.20(18) | C25-C26-H26 | 121.0(18) |
| C7-C6-H6    | 121.7(17) | C27-C26-H26 | 119.1(18) |
| C1-C6-H6    | 111.7(16) | C28-C27-C26 | 119.9(3)  |
| C5-C6-H6    | 113.6(17) | C28-C27-H27 | 120.8(19) |
| C8-C7-C6    | 118.1(3)  | C26-C27-H27 | 119.3(19) |
| C8-C7-H7    | 120.0(17) | C29-C28-C27 | 120.1(3)  |
| C6-C7-H7    | 121.9(17) | C29-C28-H28 | 119.2(16) |
| C7-C8-C3    | 114.9(3)  | C27-C28-H28 | 120.7(16) |
| C7-C8-H8    | 124.3(16) | C28-C29-C24 | 121.3(3)  |
| C3-C8-H8    | 120.7(16) | C28-C29-H29 | 120.8(16) |
| O1-C9-C10   | 120.2(2)  | C24-C29-H29 | 117.9(16) |
| O1-C9-C1    | 121.3(2)  | C35-C30-C31 | 117.7(3)  |
| C10-C9-C1   | 118.5(2)  | C35-C30-C23 | 122.6(2)  |
| C11-C10-C15 | 118.9(3)  | C31-C30-C23 | 119.8(2)  |
| C11-C10-C9  | 121.9(3)  | C32-C31-C30 | 121.3(3)  |
| C15-C10-C9  | 119.1(3)  | C32-C31-H31 | 120.3(16) |
| C12-C11-C10 | 120.2(3)  | C30-C31-H31 | 118.3(16) |
| C12-C11-H11 | 118.4(16) | C31-C32-C33 | 119.8(3)  |
| C10-C11-H11 | 121.4(16) | C31-C32-H32 | 119.6(18) |
| C13-C12-C11 | 120.3(3)  | C33-C32-H32 | 120.6(18) |
| C13-C12-H12 | 120.5(19) | C34-C33-C32 | 119.9(3)  |
| C11-C12-H12 | 119.1(19) | C34-C33-H33 | 119.8(16) |
| C14-C13-C12 | 120.4(3)  | C32-C33-H33 | 120.3(16) |
| C14-C13-H13 | 117.7(18) | C35-C34-C33 | 120.1(3)  |
| C12-C13-H13 | 121.9(19) | C35-C34-H34 | 120.9(18) |
| C13-C14-C15 | 119.7(3)  | C33-C34-H34 | 119.1(18) |
| C13-C14-H14 | 121.2(16) | C34-C35-C30 | 121.3(3)  |

|                |           |
|----------------|-----------|
| C34-C35-H35    | 120.5(17) |
| C30-C35-H35    | 118.0(17) |
| O50-C50-C52    | 111.6(7)  |
| O50-C50-C51    | 117.1(8)  |
| C52-C50-C51    | 131.2(8)  |
| C50-C51-H51A   | 109.5     |
| C50-C51-H51B   | 109.5     |
| H51A-C51-H51B  | 109.5     |
| C50-C51-H51C   | 109.5     |
| H51A-C51-H51C  | 109.5     |
| H51B-C51-H51C  | 109.5     |
| O50A-C50A-C52  | 138.3(9)  |
| O50A-C50A-C51A | 119.3(8)  |
| C52-C50A-C51A  | 102.1(9)  |
| C50A-C51A-H51D | 109.5     |
| C50A-C51A-H51E | 109.5     |
| H51D-C51A-H51E | 109.5     |
| C50A-C51A-H51F | 109.5     |
| H51D-C51A-H51F | 109.5     |
| H51E-C51A-H51F | 109.5     |
| C50A-C52-C50   | 43.1(4)   |
| C50A-C52-H52A  | 97.5      |
| C50-C52-H52A   | 109.5     |
| C50A-C52-H52B  | 148.2     |
| C50-C52-H52B   | 109.5     |
| H52A-C52-H52B  | 109.5     |
| C50A-C52-H52C  | 75.5      |
| C50-C52-H52C   | 109.5     |
| H52A-C52-H52C  | 109.5     |
| H52B-C52-H52C  | 109.5     |

(4-8-Benzhydrylidene-7-benzoyl-tricyclo[3.2.1.0<sup>2,7</sup>]oct-3-en-6-yl)-benzonitrile (**2c**)

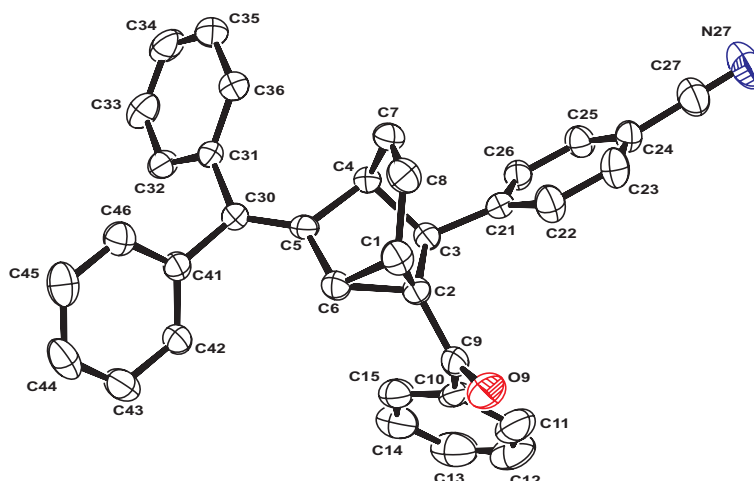

Table 1: Crystal data and structure refinement for **2c**.

|                                   |                                             |                           |
|-----------------------------------|---------------------------------------------|---------------------------|
| Empirical formula                 | C <sub>35</sub> H <sub>25</sub> NO          |                           |
| Formula weight                    | 475.56                                      |                           |
| Temperature                       | 200(2) K                                    |                           |
| Wavelength                        | 0.71073 Å                                   |                           |
| Crystal system                    | triclinic                                   |                           |
| Space group                       | P $\bar{1}$                                 |                           |
| Z                                 | 6                                           |                           |
| Unit cell dimensions              | a = 12.1762(2) Å                            | $\alpha$ = 80.239(1) deg. |
|                                   | b = 17.4387(2) Å                            | $\beta$ = 73.766(1) deg.  |
|                                   | c = 20.1060(1) Å                            | $\gamma$ = 73.137(1) deg. |
| Volume                            | 3904.56(8) Å <sup>3</sup>                   |                           |
| Density (calculated)              | 1.21 g/cm <sup>3</sup>                      |                           |
| Absorption coefficient            | 0.07 mm <sup>-1</sup>                       |                           |
| Crystal shape                     | plate                                       |                           |
| Crystal size                      | 0.40 x 0.24 x 0.08 mm <sup>3</sup>          |                           |
| Crystal colour                    | colourless                                  |                           |
| Theta range for data collection   | 1.7 to 22.7 deg.                            |                           |
| Index ranges                      | -13 ≤ h ≤ 13, -18 ≤ k ≤ 18, -21 ≤ l ≤ 21    |                           |
| Reflections collected             | 26587                                       |                           |
| Independent reflections           | 10487 (R(int) = 0.0491)                     |                           |
| Observed reflections              | 7415 (I > 2σ(I))                            |                           |
| Absorption correction             | Semi-empirical from equivalents             |                           |
| Max. and min. transmission        | 0.99 and 0.97                               |                           |
| Refinement method                 | Full-matrix least-squares on F <sup>2</sup> |                           |
| Data/restraints/parameters        | 10487 / 0 / 1000                            |                           |
| Goodness-of-fit on F <sup>2</sup> | 1.03                                        |                           |
| Final R indices (I > 2σ(I))       | R1 = 0.049, wR2 = 0.107                     |                           |
| Largest diff. peak and hole       | 0.37 and -0.23 eÅ <sup>-3</sup>             |                           |

Table 2: Atomic coordinates and equivalent isotropic displacement parameters (Å<sup>2</sup>) for **2c**. U<sub>eq</sub> is defined as one third of the trace of the orthogonalized U<sub>ij</sub> tensor.

| Atom | x          | y          | z         | U <sub>eq</sub> |
|------|------------|------------|-----------|-----------------|
| O9   | -0.1767(2) | 0.2384(1)  | 0.2153(1) | 0.0562(5)       |
| N27  | -0.0174(3) | -0.2500(2) | 0.2083(1) | 0.0716(8)       |
| C1   | 0.0773(2)  | 0.1871(1)  | 0.2075(1) | 0.0358(6)       |



|      |            |            |            |            |
|------|------------|------------|------------|------------|
| C2   | 0.0197(2)  | 0.1906(1)  | 0.1489(1)  | 0.0310(6)  |
| C3   | 0.0826(2)  | 0.1250(1)  | 0.0997(1)  | 0.0286(6)  |
| C4   | 0.2165(2)  | 0.1186(1)  | 0.0945(1)  | 0.0290(6)  |
| C5   | 0.2163(2)  | 0.2069(1)  | 0.0914(1)  | 0.0271(6)  |
| C6   | 0.1052(2)  | 0.2431(1)  | 0.1409(1)  | 0.0323(6)  |
| C7   | 0.2430(2)  | 0.0800(1)  | 0.1630(1)  | 0.0347(6)  |
| C8   | 0.1726(2)  | 0.1152(2)  | 0.2185(1)  | 0.0381(6)  |
| C9   | -0.1104(2) | 0.2263(1)  | 0.1581(2)  | 0.0383(7)  |
| C10  | -0.1556(2) | 0.2453(2)  | 0.0934(2)  | 0.0409(7)  |
| C11  | -0.2619(3) | 0.2285(2)  | 0.0945(2)  | 0.0649(9)  |
| C12  | -0.3007(3) | 0.2447(2)  | 0.0324(2)  | 0.0700(10) |
| C13  | -0.2378(3) | 0.2791(2)  | -0.0267(2) | 0.0726(10) |
| C14  | -0.1362(3) | 0.2972(2)  | -0.0277(2) | 0.0581(8)  |
| C15  | -0.0947(2) | 0.2790(2)  | 0.0324(2)  | 0.0439(7)  |
| C21  | 0.0486(2)  | 0.0460(1)  | 0.1221(1)  | 0.0290(6)  |
| C22  | -0.0018(2) | 0.0238(2)  | 0.1910(1)  | 0.0417(7)  |
| C23  | -0.0205(2) | -0.0519(2) | 0.2119(1)  | 0.0435(7)  |
| C24  | 0.0085(2)  | -0.1065(2) | 0.1632(1)  | 0.0370(6)  |
| C25  | 0.0542(2)  | -0.0842(1) | 0.0935(1)  | 0.0374(6)  |
| C26  | 0.0738(2)  | -0.0086(1) | 0.0737(1)  | 0.0330(6)  |
| C27  | -0.0060(3) | -0.1866(2) | 0.1870(2)  | 0.0493(7)  |
| C30  | 0.3019(2)  | 0.2428(1)  | 0.0559(1)  | 0.0282(6)  |
| C31  | 0.4161(2)  | 0.1982(1)  | 0.0117(1)  | 0.0299(6)  |
| C32  | 0.4627(2)  | 0.2328(2)  | -0.0541(1) | 0.0354(6)  |
| C33  | 0.5659(2)  | 0.1914(2)  | -0.0964(1) | 0.0461(7)  |
| C34  | 0.6263(2)  | 0.1164(2)  | -0.0736(2) | 0.0516(8)  |
| C35  | 0.5837(2)  | 0.0826(2)  | -0.0081(2) | 0.0536(8)  |
| C36  | 0.4795(2)  | 0.1232(2)  | 0.0341(2)  | 0.0413(7)  |
| C41  | 0.2913(2)  | 0.3292(1)  | 0.0620(1)  | 0.0288(6)  |
| C42  | 0.1983(2)  | 0.3917(1)  | 0.0466(1)  | 0.0340(6)  |
| C43  | 0.1915(2)  | 0.4703(2)  | 0.0544(1)  | 0.0448(7)  |
| C44  | 0.2758(3)  | 0.4881(2)  | 0.0785(1)  | 0.0493(8)  |
| C45  | 0.3681(3)  | 0.4267(2)  | 0.0944(1)  | 0.0496(8)  |
| C46  | 0.3761(2)  | 0.3484(2)  | 0.0857(1)  | 0.0393(7)  |
| O9A  | 0.9091(2)  | 0.4184(1)  | 0.1198(1)  | 0.0436(5)  |
| N27A | 0.7858(2)  | 0.8995(1)  | 0.0808(1)  | 0.0552(7)  |
| C1A  | 0.6591(2)  | 0.4665(1)  | 0.1244(1)  | 0.0315(6)  |
| C2A  | 0.7125(2)  | 0.4698(1)  | 0.1832(1)  | 0.0273(6)  |
| C3A  | 0.6480(2)  | 0.5414(1)  | 0.2253(1)  | 0.0272(6)  |
| C4A  | 0.5149(2)  | 0.5481(1)  | 0.2288(1)  | 0.0305(6)  |
| C5A  | 0.5136(2)  | 0.4596(1)  | 0.2410(1)  | 0.0286(6)  |
| C6A  | 0.6253(2)  | 0.4177(1)  | 0.1951(1)  | 0.0299(6)  |
| C7A  | 0.5681(2)  | 0.5379(1)  | 0.1061(1)  | 0.0354(6)  |
| C8A  | 0.4945(2)  | 0.5791(1)  | 0.1577(1)  | 0.0351(6)  |
| C9A  | 0.8417(2)  | 0.4330(1)  | 0.1764(1)  | 0.0301(6)  |
| C10A | 0.8872(2)  | 0.4160(1)  | 0.2398(1)  | 0.0343(6)  |
| C11A | 0.9958(2)  | 0.4300(2)  | 0.2364(2)  | 0.0525(8)  |
| C12A | 1.0407(3)  | 0.4141(2)  | 0.2945(2)  | 0.0739(10) |
| C13A | 0.9787(4)  | 0.3816(2)  | 0.3558(2)  | 0.0820(12) |
| C14A | 0.8727(3)  | 0.3663(2)  | 0.3599(2)  | 0.0675(10) |
| C15A | 0.8259(3)  | 0.3844(2)  | 0.3024(1)  | 0.0460(7)  |
| C21A | 0.6863(2)  | 0.6184(1)  | 0.1963(1)  | 0.0280(6)  |
| C22A | 0.7688(2)  | 0.6240(1)  | 0.1333(1)  | 0.0335(6)  |
| C23A | 0.7975(2)  | 0.6962(2)  | 0.1064(1)  | 0.0366(6)  |
| C24A | 0.7436(2)  | 0.7640(1)  | 0.1415(1)  | 0.0328(6)  |
| C25A | 0.6637(2)  | 0.7591(2)  | 0.2056(1)  | 0.0385(6)  |
| C26A | 0.6367(2)  | 0.6865(1)  | 0.2324(1)  | 0.0354(6)  |
| C27A | 0.7677(2)  | 0.8398(2)  | 0.1088(1)  | 0.0400(7)  |
| C30A | 0.4303(2)  | 0.4263(1)  | 0.2837(1)  | 0.0311(6)  |
| C31A | 0.3157(2)  | 0.4739(1)  | 0.3240(1)  | 0.0335(6)  |
| C32A | 0.2717(2)  | 0.4498(2)  | 0.3938(1)  | 0.0454(7)  |
| C33A | 0.1651(3)  | 0.4937(2)  | 0.4313(2)  | 0.0568(8)  |
| C34A | 0.0996(3)  | 0.5608(2)  | 0.3995(2)  | 0.0600(9)  |
| C35A | 0.1409(2)  | 0.5846(2)  | 0.3309(2)  | 0.0567(8)  |
| C36A | 0.2478(2)  | 0.5416(2)  | 0.2933(2)  | 0.0434(7)  |

|      |           |           |           |            |
|------|-----------|-----------|-----------|------------|
| C41A | 0.4475(2) | 0.3370(1) | 0.2918(1) | 0.0398(7)  |
| C42A | 0.5266(3) | 0.2868(2) | 0.3284(2) | 0.0691(10) |
| C43A | 0.5422(3) | 0.2035(2) | 0.3348(3) | 0.1006(16) |
| C44A | 0.4798(4) | 0.1715(2) | 0.3052(2) | 0.0952(16) |
| C45A | 0.4011(4) | 0.2200(2) | 0.2688(2) | 0.0837(13) |
| C46A | 0.3841(3) | 0.3032(2) | 0.2631(2) | 0.0579(8)  |
| O9B  | 0.4744(2) | 0.9280(1) | 0.4747(1) | 0.0514(5)  |
| N27B | 0.5836(3) | 0.4542(2) | 0.4224(2) | 0.0955(12) |
| C1B  | 0.6946(2) | 0.8608(1) | 0.5149(1) | 0.0334(6)  |
| C2B  | 0.6805(2) | 0.8680(1) | 0.4417(1) | 0.0301(6)  |
| C3B  | 0.7630(2) | 0.7993(1) | 0.3994(1) | 0.0301(6)  |
| C4B  | 0.8786(2) | 0.7827(1) | 0.4252(1) | 0.0321(6)  |
| C5B  | 0.8857(2) | 0.8681(1) | 0.4270(1) | 0.0305(6)  |
| C6B  | 0.7615(2) | 0.9122(1) | 0.4571(1) | 0.0315(6)  |
| C7B  | 0.7627(2) | 0.7836(2) | 0.5429(1) | 0.0378(6)  |
| C8B  | 0.8555(2) | 0.7436(2) | 0.4986(1) | 0.0363(6)  |
| C9B  | 0.5632(2) | 0.9126(1) | 0.4273(1) | 0.0352(6)  |
| C10B | 0.5566(2) | 0.9365(1) | 0.3539(1) | 0.0368(6)  |
| C11B | 0.6495(2) | 0.9571(1) | 0.3026(1) | 0.0421(7)  |
| C12B | 0.6393(3) | 0.9798(2) | 0.2343(2) | 0.0516(8)  |
| C13B | 0.5357(3) | 0.9803(2) | 0.2180(2) | 0.0617(9)  |
| C14B | 0.4439(3) | 0.9597(2) | 0.2684(2) | 0.0679(9)  |
| C15B | 0.4531(3) | 0.9386(2) | 0.3356(2) | 0.0518(8)  |
| C21B | 0.7196(2) | 0.7252(1) | 0.4055(1) | 0.0296(6)  |
| C22B | 0.6148(2) | 0.7155(2) | 0.4515(1) | 0.0396(7)  |
| C23B | 0.5788(2) | 0.6458(2) | 0.4569(1) | 0.0447(7)  |
| C24B | 0.6487(2) | 0.5844(2) | 0.4163(1) | 0.0418(7)  |
| C25B | 0.7541(2) | 0.5931(2) | 0.3702(1) | 0.0420(7)  |
| C26B | 0.7875(2) | 0.6633(1) | 0.3645(1) | 0.0357(6)  |
| C27B | 0.6116(3) | 0.5119(2) | 0.4211(2) | 0.0610(9)  |
| C30B | 0.9850(2) | 0.8941(1) | 0.4056(1) | 0.0330(6)  |
| C31B | 1.1029(2) | 0.8337(2) | 0.3892(1) | 0.0388(7)  |
| C32B | 1.1344(2) | 0.7704(2) | 0.4380(2) | 0.0485(7)  |
| C33B | 1.2426(3) | 0.7145(2) | 0.4254(2) | 0.0624(9)  |
| C34B | 1.3223(3) | 0.7212(2) | 0.3633(2) | 0.0701(10) |
| C35B | 1.2956(3) | 0.7831(2) | 0.3137(2) | 0.0706(10) |
| C36B | 1.1856(3) | 0.8402(2) | 0.3264(2) | 0.0567(8)  |
| C41B | 0.9876(2) | 0.9794(2) | 0.4009(1) | 0.0362(6)  |
| C42B | 1.0796(3) | 0.9981(2) | 0.4185(1) | 0.0456(7)  |
| C43B | 1.0850(3) | 1.0769(2) | 0.4142(1) | 0.0562(9)  |
| C44B | 0.9991(3) | 1.1389(2) | 0.3925(2) | 0.0620(9)  |
| C45B | 0.9079(3) | 1.1221(2) | 0.3739(1) | 0.0549(8)  |
| C46B | 0.9030(2) | 1.0428(2) | 0.3778(1) | 0.0432(7)  |

Table 3: Hydrogen coordinates and isotropic displacement parameters ( $\text{\AA}^2$ ) for **2c**.

| Atom | x       | y       | z       | $U_{\text{eq}}$ |
|------|---------|---------|---------|-----------------|
| H1   | 0.0254  | 0.2134  | 0.2499  | 0.043           |
| H3   | 0.0663  | 0.1459  | 0.0530  | 0.034           |
| H4   | 0.2722  | 0.0910  | 0.0536  | 0.035           |
| H6   | 0.0753  | 0.3029  | 0.1413  | 0.039           |
| H7   | 0.3061  | 0.0334  | 0.1662  | 0.042           |
| H8   | 0.1831  | 0.0950  | 0.2638  | 0.046           |
| H11  | -0.3069 | 0.2066  | 0.1361  | 0.078           |
| H12  | -0.3709 | 0.2317  | 0.0317  | 0.084           |
| H13  | -0.2658 | 0.2904  | -0.0679 | 0.087           |
| H14  | -0.0940 | 0.3219  | -0.0688 | 0.070           |
| H15  | -0.0223 | 0.2902  | 0.0314  | 0.053           |
| H22  | -0.0239 | 0.0615  | 0.2245  | 0.050           |
| H23  | -0.0532 | -0.0665 | 0.2595  | 0.052           |
| H25  | 0.0718  | -0.1208 | 0.0596  | 0.045           |

|      |        |        |         |       |
|------|--------|--------|---------|-------|
| H26  | 0.1051 | 0.0064 | 0.0260  | 0.040 |
| H32  | 0.4231 | 0.2853 | -0.0699 | 0.042 |
| H33  | 0.5953 | 0.2150 | -0.1417 | 0.055 |
| H34  | 0.6970 | 0.0881 | -0.1030 | 0.062 |
| H35  | 0.6259 | 0.0312 | 0.0083  | 0.064 |
| H36  | 0.4509 | 0.0991 | 0.0793  | 0.050 |
| H42  | 0.1389 | 0.3804 | 0.0306  | 0.041 |
| H43  | 0.1281 | 0.5125 | 0.0431  | 0.054 |
| H44  | 0.2703 | 0.5422 | 0.0841  | 0.059 |
| H45  | 0.4263 | 0.4384 | 0.1114  | 0.059 |
| H46  | 0.4408 | 0.3067 | 0.0961  | 0.047 |
| H1A  | 0.7128 | 0.4351 | 0.0852  | 0.038 |
| H3A  | 0.6602 | 0.5264 | 0.2734  | 0.033 |
| H4A  | 0.4579 | 0.5808 | 0.2663  | 0.037 |
| H6A  | 0.6533 | 0.3576 | 0.1999  | 0.036 |
| H7A  | 0.5627 | 0.5535 | 0.0593  | 0.042 |
| H8A  | 0.4329 | 0.6252 | 0.1502  | 0.042 |
| H11A | 1.0393 | 0.4507 | 0.1936  | 0.063 |
| H12A | 1.1135 | 0.4254 | 0.2923  | 0.089 |
| H13A | 1.0100 | 0.3696 | 0.3957  | 0.098 |
| H14A | 0.8314 | 0.3433 | 0.4024  | 0.081 |
| H15A | 0.7514 | 0.3752 | 0.3056  | 0.055 |
| H22A | 0.8060 | 0.5779 | 0.1084  | 0.040 |
| H23A | 0.8546 | 0.6990 | 0.0634  | 0.044 |
| H25A | 0.6280 | 0.8051 | 0.2308  | 0.046 |
| H26A | 0.5829 | 0.6830 | 0.2767  | 0.042 |
| H32A | 0.3153 | 0.4029 | 0.4158  | 0.054 |
| H33A | 0.1369 | 0.4776 | 0.4791  | 0.068 |
| H34A | 0.0260 | 0.5905 | 0.4254  | 0.072 |
| H35A | 0.0958 | 0.6307 | 0.3089  | 0.068 |
| H36A | 0.2754 | 0.5585 | 0.2456  | 0.052 |
| H42A | 0.5702 | 0.3090 | 0.3492  | 0.083 |
| H43A | 0.5965 | 0.1691 | 0.3598  | 0.121 |
| H44A | 0.4908 | 0.1148 | 0.3098  | 0.114 |
| H45A | 0.3587 | 0.1972 | 0.2478  | 0.100 |
| H46A | 0.3281 | 0.3371 | 0.2390  | 0.070 |
| H1B  | 0.6255 | 0.8911 | 0.5490  | 0.040 |
| H3B  | 0.7802 | 0.8207 | 0.3492  | 0.036 |
| H4B  | 0.9498 | 0.7506 | 0.3936  | 0.039 |
| H6B  | 0.7385 | 0.9722 | 0.4561  | 0.038 |
| H7B  | 0.7409 | 0.7636 | 0.5903  | 0.045 |
| H8B  | 0.9043 | 0.6935 | 0.5123  | 0.044 |
| H11B | 0.7206 | 0.9557 | 0.3142  | 0.050 |
| H12B | 0.7024 | 0.9947 | 0.1995  | 0.062 |
| H13B | 0.5283 | 0.9950 | 0.1714  | 0.074 |
| H14B | 0.3735 | 0.9603 | 0.2565  | 0.082 |
| H15B | 0.3886 | 0.9251 | 0.3702  | 0.062 |
| H22B | 0.5669 | 0.7573 | 0.4797  | 0.048 |
| H23B | 0.5065 | 0.6401 | 0.4883  | 0.054 |
| H25B | 0.8028 | 0.5508 | 0.3428  | 0.050 |
| H26B | 0.8585 | 0.6696 | 0.3318  | 0.043 |
| H32B | 1.0795 | 0.7655 | 0.4816  | 0.058 |
| H33B | 1.2614 | 0.6717 | 0.4598  | 0.075 |
| H34B | 1.3968 | 0.6827 | 0.3543  | 0.084 |
| H35B | 1.3518 | 0.7874 | 0.2706  | 0.085 |
| H36B | 1.1678 | 0.8833 | 0.2920  | 0.068 |
| H42B | 1.1394 | 0.9559 | 0.4336  | 0.055 |
| H43B | 1.1482 | 1.0883 | 0.4263  | 0.067 |
| H44B | 1.0024 | 1.1930 | 0.3904  | 0.074 |
| H45B | 0.8488 | 1.1647 | 0.3585  | 0.066 |
| H46B | 0.8406 | 1.0317 | 0.3645  | 0.052 |

Table 4: Anisotropic displacement parameters ( $\text{\AA}^2$ ) for **2c**. The anisotropic displacement factor exponent takes the form:  $-2 \pi^2 (h^2 a^{*2} U_{11} + \dots + 2 h k a^* b^* U_{12})$ .

| Atom | $U_{11}$   | $U_{22}$   | $U_{33}$   | $U_{23}$    | $U_{13}$    | $U_{12}$    |
|------|------------|------------|------------|-------------|-------------|-------------|
| O9   | 0.0401(12) | 0.0525(12) | 0.0574(13) | -0.0075(10) | 0.0117(11)  | -0.0052(9)  |
| N27  | 0.096(2)   | 0.0478(17) | 0.080(2)   | 0.0130(15)  | -0.0294(17) | -0.0368(16) |
| C1   | 0.0410(16) | 0.0351(15) | 0.0294(14) | -0.0055(11) | -0.0022(12) | -0.0114(12) |
| C2   | 0.0280(14) | 0.0264(13) | 0.0334(14) | -0.0035(11) | -0.0004(12) | -0.0055(11) |
| C3   | 0.0292(14) | 0.0246(13) | 0.0305(14) | -0.0009(11) | -0.0056(11) | -0.0072(11) |
| C4   | 0.0254(13) | 0.0251(13) | 0.0336(14) | -0.0023(11) | -0.0047(11) | -0.0049(10) |
| C5   | 0.0254(14) | 0.0242(13) | 0.0304(14) | -0.0021(11) | -0.0098(11) | -0.0017(11) |
| C6   | 0.0308(14) | 0.0270(14) | 0.0357(15) | -0.0049(11) | -0.0029(12) | -0.0063(11) |
| C7   | 0.0333(15) | 0.0285(14) | 0.0423(16) | 0.0021(12)  | -0.0155(13) | -0.0053(11) |
| C8   | 0.0448(17) | 0.0376(15) | 0.0315(15) | 0.0012(12)  | -0.0104(13) | -0.0114(13) |
| C9   | 0.0327(16) | 0.0249(14) | 0.0498(18) | -0.0077(13) | 0.0052(15)  | -0.0083(12) |
| C10  | 0.0221(14) | 0.0312(15) | 0.069(2)   | -0.0207(14) | -0.0087(14) | -0.0005(11) |
| C11  | 0.0361(18) | 0.059(2)   | 0.099(3)   | -0.0344(19) | -0.0062(19) | -0.0061(15) |
| C12  | 0.041(2)   | 0.074(2)   | 0.111(3)   | -0.040(2)   | -0.036(2)   | -0.0054(17) |
| C13  | 0.068(3)   | 0.060(2)   | 0.099(3)   | -0.025(2)   | -0.042(2)   | 0.0015(19)  |
| C14  | 0.062(2)   | 0.0472(18) | 0.069(2)   | -0.0128(16) | -0.0314(18) | -0.0024(16) |
| C15  | 0.0387(16) | 0.0383(16) | 0.0573(19) | -0.0101(14) | -0.0202(15) | -0.0028(13) |
| C21  | 0.0236(13) | 0.0292(14) | 0.0328(15) | -0.0027(11) | -0.0068(11) | -0.0048(11) |
| C22  | 0.0496(17) | 0.0355(16) | 0.0383(16) | -0.0069(13) | 0.0004(14)  | -0.0171(13) |
| C23  | 0.0504(18) | 0.0451(17) | 0.0360(16) | 0.0019(14)  | -0.0031(14) | -0.0243(14) |
| C24  | 0.0342(15) | 0.0338(15) | 0.0462(17) | 0.0042(13)  | -0.0127(13) | -0.0151(12) |
| C25  | 0.0417(16) | 0.0319(15) | 0.0407(17) | -0.0061(12) | -0.0100(13) | -0.0114(12) |
| C26  | 0.0332(15) | 0.0330(15) | 0.0334(15) | -0.0008(12) | -0.0080(12) | -0.0110(11) |
| C27  | 0.058(2)   | 0.0426(19) | 0.0535(19) | 0.0048(15)  | -0.0188(15) | -0.0224(15) |
| C30  | 0.0258(14) | 0.0272(13) | 0.0319(14) | -0.0010(11) | -0.0081(12) | -0.0072(11) |
| C31  | 0.0237(14) | 0.0265(14) | 0.0408(16) | -0.0052(12) | -0.0087(12) | -0.0067(11) |
| C32  | 0.0284(15) | 0.0363(15) | 0.0410(16) | -0.0057(13) | -0.0089(13) | -0.0061(12) |
| C33  | 0.0337(16) | 0.060(2)   | 0.0441(17) | -0.0117(15) | -0.0026(14) | -0.0141(15) |
| C34  | 0.0280(16) | 0.052(2)   | 0.072(2)   | -0.0289(17) | -0.0018(16) | -0.0040(14) |
| C35  | 0.0336(17) | 0.0335(16) | 0.086(2)   | -0.0086(16) | -0.0071(17) | -0.0028(13) |
| C36  | 0.0299(15) | 0.0333(15) | 0.0555(18) | 0.0004(13)  | -0.0065(14) | -0.0068(12) |
| C41  | 0.0281(14) | 0.0276(14) | 0.0282(14) | -0.0050(11) | -0.0008(11) | -0.0077(11) |
| C42  | 0.0336(15) | 0.0284(15) | 0.0386(15) | -0.0050(12) | -0.0050(12) | -0.0084(12) |
| C43  | 0.0503(18) | 0.0294(16) | 0.0465(17) | -0.0033(13) | -0.0042(15) | -0.0055(13) |
| C44  | 0.067(2)   | 0.0299(16) | 0.0509(18) | -0.0073(13) | -0.0055(16) | -0.0195(15) |
| C45  | 0.060(2)   | 0.0487(19) | 0.0525(18) | -0.0089(15) | -0.0153(16) | -0.0285(16) |
| C46  | 0.0393(16) | 0.0374(16) | 0.0444(17) | -0.0034(13) | -0.0135(13) | -0.0117(13) |
| O9A  | 0.0308(10) | 0.0500(11) | 0.0411(11) | -0.0117(9)  | 0.0012(9)   | -0.0025(8)  |
| N27A | 0.0770(19) | 0.0477(16) | 0.0451(15) | 0.0024(12)  | -0.0082(13) | -0.0327(14) |
| C1A  | 0.0285(14) | 0.0349(15) | 0.0305(14) | -0.0051(11) | -0.0018(12) | -0.0115(11) |
| C2A  | 0.0266(14) | 0.0252(13) | 0.0288(14) | -0.0035(11) | -0.0038(11) | -0.0069(11) |
| C3A  | 0.0261(13) | 0.0264(13) | 0.0280(13) | -0.0027(11) | -0.0049(11) | -0.0069(10) |
| C4A  | 0.0250(14) | 0.0267(13) | 0.0356(15) | -0.0033(11) | -0.0004(11) | -0.0068(10) |
| C5A  | 0.0259(14) | 0.0255(13) | 0.0332(14) | -0.0053(11) | -0.0037(12) | -0.0066(11) |
| C6A  | 0.0275(14) | 0.0248(13) | 0.0356(14) | -0.0011(11) | -0.0047(12) | -0.0080(11) |
| C7A  | 0.0354(15) | 0.0386(15) | 0.0365(15) | 0.0056(13)  | -0.0127(13) | -0.0177(13) |
| C8A  | 0.0269(14) | 0.0294(14) | 0.0476(17) | 0.0057(13)  | -0.0104(13) | -0.0091(11) |
| C9A  | 0.0294(14) | 0.0237(13) | 0.0357(16) | -0.0052(11) | -0.0022(13) | -0.0084(11) |
| C10A | 0.0315(15) | 0.0252(14) | 0.0437(17) | -0.0100(12) | -0.0097(13) | 0.0008(11)  |
| C11A | 0.0397(18) | 0.0489(18) | 0.072(2)   | -0.0160(16) | -0.0189(16) | -0.0055(14) |
| C12A | 0.062(2)   | 0.075(2)   | 0.102(3)   | -0.019(2)   | -0.047(2)   | -0.0109(19) |
| C13A | 0.105(3)   | 0.070(2)   | 0.086(3)   | -0.010(2)   | -0.068(3)   | -0.001(2)   |
| C14A | 0.099(3)   | 0.052(2)   | 0.052(2)   | 0.0032(16)  | -0.035(2)   | -0.0098(19) |
| C15A | 0.0531(18) | 0.0375(16) | 0.0463(18) | -0.0006(13) | -0.0163(16) | -0.0080(14) |
| C21A | 0.0248(13) | 0.0294(14) | 0.0302(14) | -0.0040(11) | -0.0065(12) | -0.0072(11) |
| C22A | 0.0328(15) | 0.0298(14) | 0.0359(15) | -0.0065(12) | -0.0019(12) | -0.0092(11) |
| C23A | 0.0359(15) | 0.0418(16) | 0.0321(15) | -0.0021(13) | -0.0006(12) | -0.0182(13) |
| C24A | 0.0353(15) | 0.0304(15) | 0.0368(15) | -0.0002(12) | -0.0105(13) | -0.0145(12) |

|      |            |            |            |             |             |             |
|------|------------|------------|------------|-------------|-------------|-------------|
| C25A | 0.0435(16) | 0.0311(15) | 0.0395(16) | -0.0066(12) | -0.0052(14) | -0.0101(12) |
| C26A | 0.0360(15) | 0.0318(15) | 0.0333(15) | -0.0027(12) | 0.0001(12)  | -0.0096(12) |
| C27A | 0.0469(17) | 0.0394(17) | 0.0380(16) | -0.0025(14) | -0.0101(13) | -0.0183(14) |
| C30A | 0.0278(14) | 0.0272(14) | 0.0350(14) | 0.0001(11)  | -0.0045(12) | -0.0069(11) |
| C31A | 0.0278(14) | 0.0306(14) | 0.0405(16) | -0.0021(12) | -0.0017(12) | -0.0121(12) |
| C32A | 0.0407(17) | 0.0405(16) | 0.0466(18) | -0.0026(13) | -0.0009(14) | -0.0080(13) |
| C33A | 0.0478(19) | 0.059(2)   | 0.0506(19) | -0.0094(16) | 0.0120(16)  | -0.0151(16) |
| C34A | 0.0392(18) | 0.0436(19) | 0.081(2)   | -0.0165(17) | 0.0119(18)  | -0.0056(15) |
| C35A | 0.0361(18) | 0.0401(17) | 0.079(2)   | 0.0027(16)  | -0.0005(17) | -0.0049(14) |
| C36A | 0.0285(15) | 0.0402(16) | 0.0526(18) | 0.0011(14)  | -0.0001(14) | -0.0077(13) |
| C41A | 0.0354(16) | 0.0263(14) | 0.0449(17) | -0.0013(13) | 0.0103(13)  | -0.0089(12) |
| C42A | 0.0413(18) | 0.0394(19) | 0.110(3)   | 0.0245(18)  | -0.0111(19) | -0.0109(14) |
| C43A | 0.049(2)   | 0.049(2)   | 0.155(4)   | 0.036(3)    | 0.010(3)    | 0.0013(18)  |
| C44A | 0.094(3)   | 0.035(2)   | 0.109(4)   | -0.008(2)   | 0.048(3)    | -0.013(2)   |
| C45A | 0.135(4)   | 0.056(2)   | 0.055(2)   | -0.0176(19) | 0.021(2)    | -0.054(3)   |
| C46A | 0.084(2)   | 0.0442(19) | 0.0455(18) | -0.0061(14) | -0.0009(17) | -0.0303(17) |
| O9B  | 0.0346(11) | 0.0597(13) | 0.0528(12) | -0.0106(10) | -0.0050(10) | -0.0039(9)  |
| N27B | 0.131(3)   | 0.082(2)   | 0.074(2)   | -0.0353(17) | 0.0409(19)  | -0.077(2)   |
| C1B  | 0.0316(14) | 0.0359(15) | 0.0310(14) | -0.0048(12) | -0.0027(12) | -0.0099(12) |
| C2B  | 0.0291(14) | 0.0289(14) | 0.0326(15) | -0.0006(11) | -0.0083(12) | -0.0087(11) |
| C3B  | 0.0318(14) | 0.0270(13) | 0.0312(14) | -0.0013(11) | -0.0069(12) | -0.0087(11) |
| C4B  | 0.0261(14) | 0.0327(14) | 0.0372(15) | -0.0056(12) | -0.0075(12) | -0.0061(11) |
| C5B  | 0.0334(15) | 0.0314(14) | 0.0284(14) | -0.0047(11) | -0.0100(12) | -0.0077(12) |
| C6B  | 0.0338(15) | 0.0292(14) | 0.0333(14) | -0.0038(11) | -0.0077(12) | -0.0107(11) |
| C7B  | 0.0412(16) | 0.0441(16) | 0.0294(15) | 0.0002(13)  | -0.0099(13) | -0.0136(13) |
| C8B  | 0.0377(16) | 0.0343(15) | 0.0383(16) | 0.0013(12)  | -0.0146(13) | -0.0089(12) |
| C9B  | 0.0322(16) | 0.0256(14) | 0.0481(17) | -0.0059(12) | -0.0076(14) | -0.0084(11) |
| C10B | 0.0358(16) | 0.0261(14) | 0.0462(17) | -0.0018(12) | -0.0142(14) | -0.0013(12) |
| C11B | 0.0452(17) | 0.0305(15) | 0.0493(18) | -0.0009(13) | -0.0160(15) | -0.0054(13) |
| C12B | 0.062(2)   | 0.0321(16) | 0.050(2)   | 0.0003(14)  | -0.0111(16) | -0.0010(14) |
| C13B | 0.076(2)   | 0.053(2)   | 0.053(2)   | 0.0070(16)  | -0.037(2)   | 0.0018(17)  |
| C14B | 0.058(2)   | 0.076(2)   | 0.074(3)   | 0.0116(19)  | -0.039(2)   | -0.0116(18) |
| C15B | 0.0438(18) | 0.0477(18) | 0.064(2)   | 0.0067(15)  | -0.0259(16) | -0.0061(14) |
| C21B | 0.0302(14) | 0.0306(14) | 0.0291(14) | -0.0002(11) | -0.0108(12) | -0.0076(11) |
| C22B | 0.0431(17) | 0.0329(15) | 0.0406(16) | -0.0081(12) | -0.0030(14) | -0.0106(13) |
| C23B | 0.0460(17) | 0.0426(17) | 0.0455(17) | -0.0044(14) | 0.0011(14)  | -0.0233(14) |
| C24B | 0.0553(18) | 0.0374(16) | 0.0365(16) | -0.0026(13) | -0.0043(14) | -0.0247(14) |
| C25B | 0.0508(18) | 0.0363(16) | 0.0414(16) | -0.0099(13) | -0.0064(14) | -0.0159(13) |
| C26B | 0.0320(15) | 0.0358(15) | 0.0389(16) | -0.0045(12) | -0.0049(12) | -0.0113(12) |
| C27B | 0.082(2)   | 0.057(2)   | 0.0433(18) | -0.0144(15) | 0.0162(17)  | -0.0425(19) |
| C30B | 0.0348(15) | 0.0412(16) | 0.0271(14) | -0.0045(12) | -0.0063(12) | -0.0167(12) |
| C31B | 0.0309(15) | 0.0538(18) | 0.0370(16) | -0.0141(14) | -0.0031(13) | -0.0185(13) |
| C32B | 0.0319(16) | 0.0586(19) | 0.0495(18) | -0.0115(16) | -0.0019(14) | -0.0076(14) |
| C33B | 0.0386(19) | 0.073(2)   | 0.067(2)   | -0.0103(18) | -0.0044(17) | -0.0055(16) |
| C34B | 0.047(2)   | 0.086(3)   | 0.070(2)   | -0.021(2)   | -0.010(2)   | -0.0021(18) |
| C35B | 0.038(2)   | 0.115(3)   | 0.051(2)   | -0.028(2)   | 0.0104(16)  | -0.017(2)   |
| C36B | 0.0428(19) | 0.083(2)   | 0.0441(18) | -0.0111(16) | -0.0021(15) | -0.0208(17) |
| C41B | 0.0428(16) | 0.0436(16) | 0.0262(14) | -0.0033(12) | -0.0032(13) | -0.0223(14) |
| C42B | 0.0555(19) | 0.0580(19) | 0.0318(15) | -0.0026(13) | -0.0062(14) | -0.0328(15) |
| C43B | 0.080(2)   | 0.071(2)   | 0.0336(17) | -0.0080(16) | -0.0052(17) | -0.050(2)   |
| C44B | 0.099(3)   | 0.053(2)   | 0.0398(18) | -0.0104(16) | 0.0039(19)  | -0.045(2)   |
| C45B | 0.073(2)   | 0.0459(19) | 0.0412(18) | -0.0025(14) | 0.0009(16)  | -0.0233(16) |
| C46B | 0.0534(18) | 0.0436(18) | 0.0352(16) | -0.0058(13) | -0.0029(14) | -0.0228(15) |

Table 5: Bond lengths (Å) and angles (deg) for **2c**.

|         |          |        |          |
|---------|----------|--------|----------|
| O9-C9   | 1.217(3) | C2-C3  | 1.525(3) |
| N27-C27 | 1.148(3) | C2-C6  | 1.536(3) |
| C1-C8   | 1.473(3) | C3-C21 | 1.512(3) |
| C1-C2   | 1.516(3) | C3-C4  | 1.576(3) |
| C1-C6   | 1.535(3) | C3-H3  | 1.0000   |
| C1-H1   | 1.0000   | C4-C7  | 1.504(3) |
| C2-C9   | 1.495(3) | C4-C5  | 1.531(3) |

|           |          |           |          |
|-----------|----------|-----------|----------|
| C4-H4     | 1.0000   | C3A-H3A   | 1.0000   |
| C5-C30    | 1.341(3) | C4A-C8A   | 1.502(3) |
| C5-C6     | 1.477(3) | C4A-C5A   | 1.524(3) |
| C6-H6     | 1.0000   | C4A-H4A   | 1.0000   |
| C7-C8     | 1.323(3) | C5A-C30A  | 1.339(3) |
| C7-H7     | 0.9500   | C5A-C6A   | 1.478(3) |
| C8-H8     | 0.9500   | C6A-H6A   | 1.0000   |
| C9-C10    | 1.501(4) | C7A-C8A   | 1.325(3) |
| C10-C15   | 1.379(4) | C7A-H7A   | 0.9500   |
| C10-C11   | 1.401(4) | C8A-H8A   | 0.9500   |
| C11-C12   | 1.411(5) | C9A-C10A  | 1.480(3) |
| C11-H11   | 0.9500   | C10A-C15A | 1.386(3) |
| C12-C13   | 1.370(5) | C10A-C11A | 1.394(4) |
| C12-H12   | 0.9500   | C11A-C12A | 1.378(4) |
| C13-C14   | 1.358(4) | C11A-H11A | 0.9500   |
| C13-H13   | 0.9500   | C12A-C13A | 1.378(5) |
| C14-C15   | 1.390(4) | C12A-H12A | 0.9500   |
| C14-H14   | 0.9500   | C13A-C14A | 1.370(5) |
| C15-H15   | 0.9500   | C13A-H13A | 0.9500   |
| C21-C26   | 1.387(3) | C14A-C15A | 1.380(4) |
| C21-C22   | 1.389(3) | C14A-H14A | 0.9500   |
| C22-C23   | 1.381(3) | C15A-H15A | 0.9500   |
| C22-H22   | 0.9500   | C21A-C22A | 1.387(3) |
| C23-C24   | 1.383(4) | C21A-C26A | 1.391(3) |
| C23-H23   | 0.9500   | C22A-C23A | 1.385(3) |
| C24-C25   | 1.390(3) | C22A-H22A | 0.9500   |
| C24-C27   | 1.442(4) | C23A-C24A | 1.379(3) |
| C25-C26   | 1.381(3) | C23A-H23A | 0.9500   |
| C25-H25   | 0.9500   | C24A-C25A | 1.386(3) |
| C26-H26   | 0.9500   | C24A-C27A | 1.445(3) |
| C30-C31   | 1.497(3) | C25A-C26A | 1.384(3) |
| C30-C41   | 1.497(3) | C25A-H25A | 0.9500   |
| C31-C36   | 1.385(3) | C26A-H26A | 0.9500   |
| C31-C32   | 1.394(3) | C30A-C31A | 1.488(3) |
| C32-C33   | 1.381(3) | C30A-C41A | 1.497(3) |
| C32-H32   | 0.9500   | C31A-C36A | 1.389(3) |
| C33-C34   | 1.374(4) | C31A-C32A | 1.394(3) |
| C33-H33   | 0.9500   | C32A-C33A | 1.382(4) |
| C34-C35   | 1.372(4) | C32A-H32A | 0.9500   |
| C34-H34   | 0.9500   | C33A-C34A | 1.379(4) |
| C35-C36   | 1.382(4) | C33A-H33A | 0.9500   |
| C35-H35   | 0.9500   | C34A-C35A | 1.368(4) |
| C36-H36   | 0.9500   | C34A-H34A | 0.9500   |
| C41-C42   | 1.390(3) | C35A-C36A | 1.379(4) |
| C41-C46   | 1.391(3) | C35A-H35A | 0.9500   |
| C42-C43   | 1.382(3) | C36A-H36A | 0.9500   |
| C42-H42   | 0.9500   | C41A-C46A | 1.381(4) |
| C43-C44   | 1.376(4) | C41A-C42A | 1.388(4) |
| C43-H43   | 0.9500   | C42A-C43A | 1.397(5) |
| C44-C45   | 1.378(4) | C42A-H42A | 0.9500   |
| C44-H44   | 0.9500   | C43A-C44A | 1.362(6) |
| C45-C46   | 1.379(3) | C43A-H43A | 0.9500   |
| C45-H45   | 0.9500   | C44A-C45A | 1.371(6) |
| C46-H46   | 0.9500   | C44A-H44A | 0.9500   |
| O9A-C9A   | 1.220(3) | C45A-C46A | 1.394(4) |
| N27A-C27A | 1.147(3) | C45A-H45A | 0.9500   |
| C1A-C7A   | 1.478(3) | C46A-H46A | 0.9500   |
| C1A-C2A   | 1.517(3) | O9B-C9B   | 1.222(3) |
| C1A-C6A   | 1.543(3) | N27B-C27B | 1.147(3) |
| C1A-H1A   | 1.0000   | C1B-C7B   | 1.475(3) |
| C2A-C9A   | 1.494(3) | C1B-C2B   | 1.510(3) |
| C2A-C3A   | 1.520(3) | C1B-C6B   | 1.535(3) |
| C2A-C6A   | 1.533(3) | C1B-H1B   | 1.0000   |
| C3A-C21A  | 1.518(3) | C2B-C9B   | 1.496(3) |
| C3A-C4A   | 1.573(3) | C2B-C3B   | 1.528(3) |

|           |           |             |            |
|-----------|-----------|-------------|------------|
| C2B-C6B   | 1.536(3)  | C6-C1-H1    | 116.6      |
| C3B-C21B  | 1.507(3)  | C9-C2-C1    | 120.2(2)   |
| C3B-C4B   | 1.567(3)  | C9-C2-C3    | 119.1(2)   |
| C3B-H3B   | 1.0000    | C1-C2-C3    | 114.6(2)   |
| C4B-C8B   | 1.503(3)  | C9-C2-C6    | 121.65(19) |
| C4B-C5B   | 1.523(3)  | C1-C2-C6    | 60.38(15)  |
| C4B-H4B   | 1.0000    | C3-C2-C6    | 106.84(18) |
| C5B-C30B  | 1.346(3)  | C21-C3-C2   | 115.71(19) |
| C5B-C6B   | 1.489(3)  | C21-C3-C4   | 114.13(18) |
| C6B-H6B   | 1.0000    | C2-C3-C4    | 101.53(18) |
| C7B-C8B   | 1.321(3)  | C21-C3-H3   | 108.4      |
| C7B-H7B   | 0.9500    | C2-C3-H3    | 108.4      |
| C8B-H8B   | 0.9500    | C4-C3-H3    | 108.4      |
| C9B-C10B  | 1.482(4)  | C7-C4-C5    | 105.56(19) |
| C10B-C11B | 1.389(3)  | C7-C4-C3    | 107.95(18) |
| C10B-C15B | 1.398(4)  | C5-C4-C3    | 102.13(17) |
| C11B-C12B | 1.392(4)  | C7-C4-H4    | 113.4      |
| C11B-H11B | 0.9500    | C5-C4-H4    | 113.4      |
| C12B-C13B | 1.387(4)  | C3-C4-H4    | 113.4      |
| C12B-H12B | 0.9500    | C30-C5-C6   | 127.0(2)   |
| C13B-C14B | 1.372(4)  | C30-C5-C4   | 127.9(2)   |
| C13B-H13B | 0.9500    | C6-C5-C4    | 104.98(18) |
| C14B-C15B | 1.366(4)  | C5-C6-C1    | 112.7(2)   |
| C14B-H14B | 0.9500    | C5-C6-C2    | 107.22(19) |
| C15B-H15B | 0.9500    | C1-C6-C2    | 59.15(15)  |
| C21B-C22B | 1.387(3)  | C5-C6-H6    | 120.7      |
| C21B-C26B | 1.390(3)  | C1-C6-H6    | 120.7      |
| C22B-C23B | 1.385(3)  | C2-C6-H6    | 120.7      |
| C22B-H22B | 0.9500    | C8-C7-C4    | 115.5(2)   |
| C23B-C24B | 1.384(4)  | C8-C7-H7    | 122.2      |
| C23B-H23B | 0.9500    | C4-C7-H7    | 122.2      |
| C24B-C25B | 1.389(4)  | C7-C8-C1    | 117.6(2)   |
| C24B-C27B | 1.441(4)  | C7-C8-H8    | 121.2      |
| C25B-C26B | 1.376(3)  | C1-C8-H8    | 121.2      |
| C25B-H25B | 0.9500    | O9-C9-C2    | 121.8(3)   |
| C26B-H26B | 0.9500    | O9-C9-C10   | 121.6(2)   |
| C30B-C41B | 1.485(3)  | C2-C9-C10   | 116.6(2)   |
| C30B-C31B | 1.502(3)  | C15-C10-C11 | 118.8(3)   |
| C31B-C32B | 1.387(4)  | C15-C10-C9  | 121.4(2)   |
| C31B-C36B | 1.390(4)  | C11-C10-C9  | 119.7(3)   |
| C32B-C33B | 1.379(4)  | C10-C11-C12 | 118.7(3)   |
| C32B-H32B | 0.9500    | C10-C11-H11 | 120.7      |
| C33B-C34B | 1.362(4)  | C12-C11-H11 | 120.7      |
| C33B-H33B | 0.9500    | C13-C12-C11 | 120.4(3)   |
| C34B-C35B | 1.370(4)  | C13-C12-H12 | 119.8      |
| C34B-H34B | 0.9500    | C11-C12-H12 | 119.8      |
| C35B-C36B | 1.404(4)  | C14-C13-C12 | 121.2(3)   |
| C35B-H35B | 0.9500    | C14-C13-H13 | 119.4      |
| C36B-H36B | 0.9500    | C12-C13-H13 | 119.4      |
| C41B-C46B | 1.390(4)  | C13-C14-C15 | 119.1(3)   |
| C41B-C42B | 1.399(4)  | C13-C14-H14 | 120.5      |
| C42B-C43B | 1.381(4)  | C15-C14-H14 | 120.5      |
| C42B-H42B | 0.9500    | C10-C15-C14 | 121.8(3)   |
| C43B-C44B | 1.375(4)  | C10-C15-H15 | 119.1      |
| C43B-H43B | 0.9500    | C14-C15-H15 | 119.1      |
| C44B-C45B | 1.385(4)  | C26-C21-C22 | 118.1(2)   |
| C44B-H44B | 0.9500    | C26-C21-C3  | 119.9(2)   |
| C45B-C46B | 1.389(4)  | C22-C21-C3  | 121.9(2)   |
| C45B-H45B | 0.9500    | C23-C22-C21 | 121.2(2)   |
| C46B-H46B | 0.9500    | C23-C22-H22 | 119.4      |
| C8-C1-C2  | 118.0(2)  | C21-C22-H22 | 119.4      |
| C8-C1-C6  | 116.6(2)  | C22-C23-C24 | 119.9(2)   |
| C2-C1-C6  | 60.47(15) | C22-C23-H23 | 120.1      |
| C8-C1-H1  | 116.6     | C24-C23-H23 | 120.1      |
| C2-C1-H1  | 116.6     | C23-C24-C25 | 119.8(2)   |

|              |            |                |            |
|--------------|------------|----------------|------------|
| C23-C24-C27  | 118.6(2)   | C4A-C3A-H3A    | 108.3      |
| C25-C24-C27  | 121.6(2)   | C8A-C4A-C5A    | 107.46(19) |
| C26-C25-C24  | 119.6(2)   | C8A-C4A-C3A    | 107.86(18) |
| C26-C25-H25  | 120.2      | C5A-C4A-C3A    | 101.15(17) |
| C24-C25-H25  | 120.2      | C8A-C4A-H4A    | 113.2      |
| C25-C26-C21  | 121.4(2)   | C5A-C4A-H4A    | 113.2      |
| C25-C26-H26  | 119.3      | C3A-C4A-H4A    | 113.2      |
| C21-C26-H26  | 119.3      | C30A-C5A-C6A   | 127.0(2)   |
| N27-C27-C24  | 177.6(3)   | C30A-C5A-C4A   | 128.1(2)   |
| C5-C30-C31   | 122.5(2)   | C6A-C5A-C4A    | 104.99(18) |
| C5-C30-C41   | 121.3(2)   | C5A-C6A-C2A    | 106.83(19) |
| C31-C30-C41  | 116.09(19) | C5A-C6A-C1A    | 113.07(19) |
| C36-C31-C32  | 117.8(2)   | C2A-C6A-C1A    | 59.06(14)  |
| C36-C31-C30  | 122.4(2)   | C5A-C6A-H6A    | 120.7      |
| C32-C31-C30  | 119.8(2)   | C2A-C6A-H6A    | 120.7      |
| C33-C32-C31  | 120.6(2)   | C1A-C6A-H6A    | 120.7      |
| C33-C32-H32  | 119.7      | C8A-C7A-C1A    | 117.3(2)   |
| C31-C32-H32  | 119.7      | C8A-C7A-H7A    | 121.4      |
| C34-C33-C32  | 120.6(3)   | C1A-C7A-H7A    | 121.4      |
| C34-C33-H33  | 119.7      | C7A-C8A-C4A    | 115.4(2)   |
| C32-C33-H33  | 119.7      | C7A-C8A-H8A    | 122.3      |
| C35-C34-C33  | 119.6(3)   | C4A-C8A-H8A    | 122.3      |
| C35-C34-H34  | 120.2      | O9A-C9A-C10A   | 120.4(2)   |
| C33-C34-H34  | 120.2      | O9A-C9A-C2A    | 121.0(2)   |
| C34-C35-C36  | 120.1(3)   | C10A-C9A-C2A   | 118.6(2)   |
| C34-C35-H35  | 120.0      | C15A-C10A-C11A | 118.9(3)   |
| C36-C35-H35  | 120.0      | C15A-C10A-C9A  | 121.6(2)   |
| C35-C36-C31  | 121.3(3)   | C11A-C10A-C9A  | 119.5(2)   |
| C35-C36-H36  | 119.3      | C12A-C11A-C10A | 120.7(3)   |
| C31-C36-H36  | 119.3      | C12A-C11A-H11A | 119.6      |
| C42-C41-C46  | 117.8(2)   | C10A-C11A-H11A | 119.6      |
| C42-C41-C30  | 122.9(2)   | C11A-C12A-C13A | 119.2(3)   |
| C46-C41-C30  | 119.2(2)   | C11A-C12A-H12A | 120.4      |
| C43-C42-C41  | 120.6(2)   | C13A-C12A-H12A | 120.4      |
| C43-C42-H42  | 119.7      | C14A-C13A-C12A | 121.0(3)   |
| C41-C42-H42  | 119.7      | C14A-C13A-H13A | 119.5      |
| C44-C43-C42  | 120.7(3)   | C12A-C13A-H13A | 119.5      |
| C44-C43-H43  | 119.7      | C13A-C14A-C15A | 119.8(3)   |
| C42-C43-H43  | 119.7      | C13A-C14A-H14A | 120.1      |
| C43-C44-C45  | 119.5(2)   | C15A-C14A-H14A | 120.1      |
| C43-C44-H44  | 120.3      | C14A-C15A-C10A | 120.4(3)   |
| C45-C44-H44  | 120.3      | C14A-C15A-H15A | 119.8      |
| C44-C45-C46  | 120.0(3)   | C10A-C15A-H15A | 119.8      |
| C44-C45-H45  | 120.0      | C22A-C21A-C26A | 118.0(2)   |
| C46-C45-H45  | 120.0      | C22A-C21A-C3A  | 122.0(2)   |
| C45-C46-C41  | 121.4(2)   | C26A-C21A-C3A  | 120.0(2)   |
| C45-C46-H46  | 119.3      | C23A-C22A-C21A | 120.8(2)   |
| C41-C46-H46  | 119.3      | C23A-C22A-H22A | 119.6      |
| C7A-C1A-C2A  | 118.1(2)   | C21A-C22A-H22A | 119.6      |
| C7A-C1A-C6A  | 117.3(2)   | C24A-C23A-C22A | 120.4(2)   |
| C2A-C1A-C6A  | 60.15(15)  | C24A-C23A-H23A | 119.8      |
| C7A-C1A-H1A  | 116.5      | C22A-C23A-H23A | 119.8      |
| C2A-C1A-H1A  | 116.5      | C23A-C24A-C25A | 119.8(2)   |
| C6A-C1A-H1A  | 116.5      | C23A-C24A-C27A | 118.8(2)   |
| C9A-C2A-C1A  | 118.9(2)   | C25A-C24A-C27A | 121.3(2)   |
| C9A-C2A-C3A  | 120.6(2)   | C26A-C25A-C24A | 119.3(2)   |
| C1A-C2A-C3A  | 114.00(19) | C26A-C25A-H25A | 120.4      |
| C9A-C2A-C6A  | 121.51(19) | C24A-C25A-H25A | 120.4      |
| C1A-C2A-C6A  | 60.79(15)  | C25A-C26A-C21A | 121.7(2)   |
| C3A-C2A-C6A  | 106.46(18) | C25A-C26A-H26A | 119.2      |
| C21A-C3A-C2A | 115.36(18) | C21A-C26A-H26A | 119.2      |
| C21A-C3A-C4A | 114.14(18) | N27A-C27A-C24A | 177.5(3)   |
| C2A-C3A-C4A  | 101.95(18) | C5A-C30A-C31A  | 123.4(2)   |
| C21A-C3A-H3A | 108.3      | C5A-C30A-C41A  | 120.5(2)   |
| C2A-C3A-H3A  | 108.3      | C31A-C30A-C41A | 116.1(2)   |



|                |            |                |           |
|----------------|------------|----------------|-----------|
| C36A-C31A-C32A | 118.0(2)   | C1B-C6B-C2B    | 58.88(15) |
| C36A-C31A-C30A | 121.7(2)   | C5B-C6B-H6B    | 120.7     |
| C32A-C31A-C30A | 120.3(2)   | C1B-C6B-H6B    | 120.7     |
| C33A-C32A-C31A | 120.5(3)   | C2B-C6B-H6B    | 120.7     |
| C33A-C32A-H32A | 119.8      | C8B-C7B-C1B    | 116.7(2)  |
| C31A-C32A-H32A | 119.8      | C8B-C7B-H7B    | 121.7     |
| C34A-C33A-C32A | 120.3(3)   | C1B-C7B-H7B    | 121.7     |
| C34A-C33A-H33A | 119.8      | C7B-C8B-C4B    | 115.6(2)  |
| C32A-C33A-H33A | 119.8      | C7B-C8B-H8B    | 122.2     |
| C35A-C34A-C33A | 119.9(3)   | C4B-C8B-H8B    | 122.2     |
| C35A-C34A-H34A | 120.1      | O9B-C9B-C10B   | 120.5(2)  |
| C33A-C34A-H34A | 120.1      | O9B-C9B-C2B    | 121.0(2)  |
| C34A-C35A-C36A | 120.1(3)   | C10B-C9B-C2B   | 118.4(2)  |
| C34A-C35A-H35A | 119.9      | C11B-C10B-C15B | 118.8(3)  |
| C36A-C35A-H35A | 119.9      | C11B-C10B-C9B  | 122.4(2)  |
| C35A-C36A-C31A | 121.2(3)   | C15B-C10B-C9B  | 118.8(2)  |
| C35A-C36A-H36A | 119.4      | C10B-C11B-C12B | 120.5(3)  |
| C31A-C36A-H36A | 119.4      | C10B-C11B-H11B | 119.7     |
| C46A-C41A-C42A | 118.8(3)   | C12B-C11B-H11B | 119.7     |
| C46A-C41A-C30A | 120.3(3)   | C13B-C12B-C11B | 119.1(3)  |
| C42A-C41A-C30A | 120.9(3)   | C13B-C12B-H12B | 120.5     |
| C41A-C42A-C43A | 119.9(4)   | C11B-C12B-H12B | 120.5     |
| C41A-C42A-H42A | 120.0      | C14B-C13B-C12B | 120.6(3)  |
| C43A-C42A-H42A | 120.0      | C14B-C13B-H13B | 119.7     |
| C44A-C43A-C42A | 120.2(4)   | C12B-C13B-H13B | 119.7     |
| C44A-C43A-H43A | 119.9      | C15B-C14B-C13B | 120.5(3)  |
| C42A-C43A-H43A | 119.9      | C15B-C14B-H14B | 119.8     |
| C43A-C44A-C45A | 120.9(4)   | C13B-C14B-H14B | 119.8     |
| C43A-C44A-H44A | 119.6      | C14B-C15B-C10B | 120.5(3)  |
| C45A-C44A-H44A | 119.6      | C14B-C15B-H15B | 119.7     |
| C44A-C45A-C46A | 119.2(4)   | C10B-C15B-H15B | 119.7     |
| C44A-C45A-H45A | 120.4      | C22B-C21B-C26B | 118.4(2)  |
| C46A-C45A-H45A | 120.4      | C22B-C21B-C3B  | 122.5(2)  |
| C41A-C46A-C45A | 121.0(3)   | C26B-C21B-C3B  | 119.1(2)  |
| C41A-C46A-H46A | 119.5      | C23B-C22B-C21B | 121.0(2)  |
| C45A-C46A-H46A | 119.5      | C23B-C22B-H22B | 119.5     |
| C7B-C1B-C2B    | 118.5(2)   | C21B-C22B-H22B | 119.5     |
| C7B-C1B-C6B    | 118.4(2)   | C24B-C23B-C22B | 119.7(2)  |
| C2B-C1B-C6B    | 60.59(15)  | C24B-C23B-H23B | 120.1     |
| C7B-C1B-H1B    | 116.0      | C22B-C23B-H23B | 120.1     |
| C2B-C1B-H1B    | 116.0      | C23B-C24B-C25B | 119.9(2)  |
| C6B-C1B-H1B    | 116.0      | C23B-C24B-C27B | 120.1(2)  |
| C9B-C2B-C1B    | 118.5(2)   | C25B-C24B-C27B | 119.9(2)  |
| C9B-C2B-C3B    | 121.5(2)   | C26B-C25B-C24B | 119.7(2)  |
| C1B-C2B-C3B    | 113.89(19) | C26B-C25B-H25B | 120.1     |
| C9B-C2B-C6B    | 121.3(2)   | C24B-C25B-H25B | 120.1     |
| C1B-C2B-C6B    | 60.53(15)  | C25B-C26B-C21B | 121.3(2)  |
| C3B-C2B-C6B    | 105.74(18) | C25B-C26B-H26B | 119.4     |
| C21B-C3B-C2B   | 116.85(19) | C21B-C26B-H26B | 119.4     |
| C21B-C3B-C4B   | 113.40(18) | N27B-C27B-C24B | 177.5(3)  |
| C2B-C3B-C4B    | 101.89(18) | C5B-C30B-C41B  | 124.4(2)  |
| C21B-C3B-H3B   | 108.1      | C5B-C30B-C31B  | 119.3(2)  |
| C2B-C3B-H3B    | 108.1      | C41B-C30B-C31B | 116.3(2)  |
| C4B-C3B-H3B    | 108.1      | C32B-C31B-C36B | 117.6(3)  |
| C8B-C4B-C5B    | 108.41(19) | C32B-C31B-C30B | 120.5(2)  |
| C8B-C4B-C3B    | 107.78(19) | C36B-C31B-C30B | 121.9(3)  |
| C5B-C4B-C3B    | 101.28(18) | C33B-C32B-C31B | 122.2(3)  |
| C8B-C4B-H4B    | 112.9      | C33B-C32B-H32B | 118.9     |
| C5B-C4B-H4B    | 112.9      | C31B-C32B-H32B | 118.9     |
| C3B-C4B-H4B    | 112.9      | C34B-C33B-C32B | 119.5(3)  |
| C30B-C5B-C6B   | 130.2(2)   | C34B-C33B-H33B | 120.3     |
| C30B-C5B-C4B   | 125.5(2)   | C32B-C33B-H33B | 120.3     |
| C6B-C5B-C4B    | 104.30(19) | C33B-C34B-C35B | 120.4(3)  |
| C5B-C6B-C1B    | 112.8(2)   | C33B-C34B-H34B | 119.8     |
| C5B-C6B-C2B    | 107.11(19) | C35B-C34B-H34B | 119.8     |

|                |          |
|----------------|----------|
| C34B-C35B-C36B | 120.4(3) |
| C34B-C35B-H35B | 119.8    |
| C36B-C35B-H35B | 119.8    |
| C31B-C36B-C35B | 119.9(3) |
| C31B-C36B-H36B | 120.0    |
| C35B-C36B-H36B | 120.0    |
| C46B-C41B-C42B | 117.7(2) |
| C46B-C41B-C30B | 122.5(2) |
| C42B-C41B-C30B | 119.8(2) |
| C43B-C42B-C41B | 121.1(3) |
| C43B-C42B-H42B | 119.4    |
| C41B-C42B-H42B | 119.4    |
| C44B-C43B-C42B | 120.3(3) |
| C44B-C43B-H43B | 119.8    |
| C42B-C43B-H43B | 119.8    |
| C43B-C44B-C45B | 119.7(3) |
| C43B-C44B-H44B | 120.1    |
| C45B-C44B-H44B | 120.1    |
| C44B-C45B-C46B | 119.9(3) |
| C44B-C45B-H45B | 120.0    |
| C46B-C45B-H45B | 120.0    |
| C45B-C46B-C41B | 121.2(3) |
| C45B-C46B-H46B | 119.4    |
| C41B-C46B-H46B | 119.4    |

**(3,3-Diphenyl-indan-1-yl)-p-tolyl-methanone (11e)**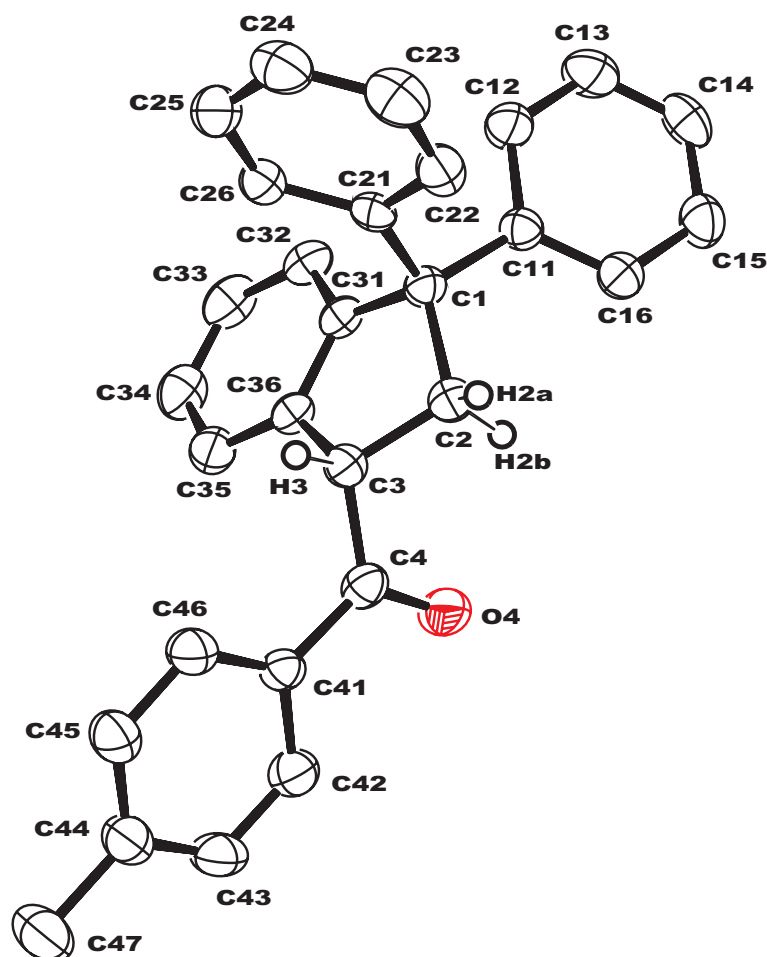Table 1: Crystal data and structure refinement for **11e**.

|                                   |                                             |                             |
|-----------------------------------|---------------------------------------------|-----------------------------|
| Empirical formula                 | C <sub>29</sub> H <sub>24</sub> O           |                             |
| Formula weight                    | 388.48                                      |                             |
| Temperature                       | 200(2) K                                    |                             |
| Wavelength                        | 0.71073 Å                                   |                             |
| Crystal system                    | triclinic                                   |                             |
| Space group                       | P $\bar{1}$                                 |                             |
| Z                                 | 2                                           |                             |
| Unit cell dimensions              | a = 8.5190(2) Å                             | $\alpha$ = 73.0570(11) deg. |
|                                   | b = 12.5850(3) Å                            | $\beta$ = 86.7680(12) deg.  |
|                                   | c = 10.2410(1) Å                            | $\gamma$ = 98.8770(9) deg.  |
| Volume                            | 1031.73(4) Å <sup>3</sup>                   |                             |
| Density (calculated)              | 1.25 g/cm <sup>3</sup>                      |                             |
| Absorption coefficient            | 0.07 mm <sup>-1</sup>                       |                             |
| Crystal shape                     | polyhedron                                  |                             |
| Crystal size                      | 0.49 x 0.17 x 0.06 mm <sup>3</sup>          |                             |
| Crystal colour                    | colorless                                   |                             |
| Theta range for data collection   | 1.7 to 24.7 deg.                            |                             |
| Index ranges                      | -10 ≤ h ≤ 9, -14 ≤ k ≤ 14, -12 ≤ l ≤ 12     |                             |
| Reflections collected             | 14378                                       |                             |
| Independent reflections           | 14378 (R(int) = 0.0000)                     |                             |
| Observed reflections              | 9690 (I > 2σ(I))                            |                             |
| Absorption correction             | Semi-empirical from equivalents             |                             |
| Refinement method                 | Full-matrix least-squares on F <sup>2</sup> |                             |
| Data/restraints/parameters        | 14378 / 0 / 285                             |                             |
| Goodness-of-fit on F <sup>2</sup> | 1.00                                        |                             |
| Final R indices (I > 2σ(I))       | R1 = 0.048, wR2 = 0.112                     |                             |
| Largest diff. peak and hole       | 0.17 and -0.18 eÅ <sup>-3</sup>             |                             |

Table 2: Atomic coordinates and equivalent isotropic displacement parameters ( $\text{\AA}^2$ ) for **11e**.  $U_{\text{eq}}$  is defined as one third of the trace of the orthogonalized  $U_{ij}$  tensor.

| Atom | x           | y          | z          | $U_{\text{eq}}$ |
|------|-------------|------------|------------|-----------------|
| C1   | 0.2965(1)   | 0.7563(1)  | 1.0264(1)  | 0.0292(3)       |
| C2   | 0.1737(2)   | 0.6590(1)  | 1.0077(1)  | 0.0335(3)       |
| H2A  | 0.1079(15)  | 0.6177(10) | 1.0931(13) | 0.036(4)        |
| H2B  | 0.2324(13)  | 0.6118(10) | 0.9704(11) | 0.032(3)        |
| C3   | 0.0735(2)   | 0.7132(1)  | 0.8966(1)  | 0.0307(3)       |
| H3   | -0.0182(15) | 0.7394(9)  | 0.9354(12) | 0.036(3)        |
| C4   | 0.0173(2)   | 0.6381(1)  | 0.8089(1)  | 0.0336(3)       |
| O4   | 0.0989(1)   | 0.5711(1)  | 0.7903(1)  | 0.0490(3)       |
| C11  | 0.4510(1)   | 0.7212(1)  | 1.0799(1)  | 0.0301(3)       |
| C12  | 0.5619(2)   | 0.7992(1)  | 1.1142(1)  | 0.0411(3)       |
| C13  | 0.7030(2)   | 0.7722(1)  | 1.1622(1)  | 0.0482(4)       |
| C14  | 0.7363(2)   | 0.6660(1)  | 1.1786(1)  | 0.0433(4)       |
| C15  | 0.6269(2)   | 0.5870(1)  | 1.1472(1)  | 0.0428(3)       |
| C16  | 0.4860(2)   | 0.6144(1)  | 1.0979(1)  | 0.0368(3)       |
| C21  | 0.2172(1)   | 0.8093(1)  | 1.1258(1)  | 0.0281(3)       |
| C22  | 0.1856(2)   | 0.7487(1)  | 1.2644(1)  | 0.0383(3)       |
| C23  | 0.1145(2)   | 0.7919(1)  | 1.3573(1)  | 0.0472(4)       |
| C24  | 0.0733(2)   | 0.8972(1)  | 1.3143(2)  | 0.0463(4)       |
| C25  | 0.1032(2)   | 0.9581(1)  | 1.1783(1)  | 0.0418(3)       |
| C26  | 0.1745(1)   | 0.9150(1)  | 1.0845(1)  | 0.0334(3)       |
| C31  | 0.3212(1)   | 0.8376(1)  | 0.8807(1)  | 0.0299(3)       |
| C32  | 0.4446(2)   | 0.9268(1)  | 0.8184(1)  | 0.0360(3)       |
| C33  | 0.4356(2)   | 0.9949(1)  | 0.6872(1)  | 0.0449(4)       |
| C34  | 0.3048(2)   | 0.9753(1)  | 0.6191(1)  | 0.0459(4)       |
| C35  | 0.1817(2)   | 0.8854(1)  | 0.6797(1)  | 0.0384(3)       |
| C36  | 0.1906(1)   | 0.8169(1)  | 0.8102(1)  | 0.0300(3)       |
| C41  | -0.1299(1)  | 0.6507(1)  | 0.7402(1)  | 0.0306(3)       |
| C42  | -0.1598(2)  | 0.5968(1)  | 0.6407(1)  | 0.0394(3)       |
| C43  | -0.2925(2)  | 0.6070(1)  | 0.5715(1)  | 0.0446(4)       |
| C44  | -0.4031(2)  | 0.6693(1)  | 0.6007(1)  | 0.0415(3)       |
| C45  | -0.3750(2)  | 0.7214(1)  | 0.7002(2)  | 0.0470(4)       |
| C46  | -0.2409(2)  | 0.7132(1)  | 0.7692(1)  | 0.0423(3)       |
| C47  | -0.5505(2)  | 0.6786(1)  | 0.5270(2)  | 0.0605(4)       |

Table 3: Hydrogen coordinates and isotropic displacement parameters ( $\text{\AA}^2$ ) for **11e**.

| Atom | x           | y          | z          | $U_{\text{eq}}$ |
|------|-------------|------------|------------|-----------------|
| H2A  | 0.1079(15)  | 0.6177(10) | 1.0931(13) | 0.036(4)        |
| H2B  | 0.2324(13)  | 0.6118(10) | 0.9704(11) | 0.032(3)        |
| H3   | -0.0182(15) | 0.7394(9)  | 0.9354(12) | 0.036(3)        |
| H12  | 0.5400      | 0.8727     | 1.1042     | 0.049           |
| H13  | 0.7774      | 0.8272     | 1.1842     | 0.058           |
| H14  | 0.8338      | 0.6472     | 1.2111     | 0.052           |
| H15  | 0.6485      | 0.5130     | 1.1594     | 0.051           |
| H16  | 0.4120      | 0.5591     | 1.0762     | 0.044           |
| H22  | 0.2135      | 0.6760     | 1.2959     | 0.046           |
| H23  | 0.0940      | 0.7488     | 1.4515     | 0.057           |
| H24  | 0.0247      | 0.9271     | 1.3782     | 0.056           |
| H25  | 0.0749      | 1.0308     | 1.1477     | 0.050           |
| H26  | 0.1943      | 0.9587     | 0.9905     | 0.040           |
| H32  | 0.5346      | 0.9411     | 0.8655     | 0.043           |
| H33  | 0.5204      | 1.0559     | 0.6436     | 0.054           |

|      |         |        |        |       |
|------|---------|--------|--------|-------|
| H34  | 0.2989  | 1.0237 | 0.5296 | 0.055 |
| H35  | 0.0922  | 0.8713 | 0.6320 | 0.046 |
| H42  | -0.0870 | 0.5523 | 0.6204 | 0.047 |
| H43  | -0.3090 | 0.5709 | 0.5027 | 0.054 |
| H45  | -0.4499 | 0.7640 | 0.7218 | 0.056 |
| H46  | -0.2241 | 0.7505 | 0.8369 | 0.051 |
| H47A | -0.5260 | 0.6784 | 0.4324 | 0.091 |
| H47B | -0.5866 | 0.7490 | 0.5261 | 0.091 |
| H47C | -0.6351 | 0.6143 | 0.5744 | 0.091 |

Table 4: Anisotropic displacement parameters ( $\text{\AA}^2$ ) for **11e**. The anisotropic displacement factor exponent takes the form:  $-2 \pi^2 (h^2 a^{*2} U_{11} + \dots + 2 h k a^* b^* U_{12})$ .

| Atom | $U_{11}$   | $U_{22}$   | $U_{33}$   | $U_{23}$   | $U_{13}$   | $U_{12}$   |
|------|------------|------------|------------|------------|------------|------------|
| C1   | 0.0269(7)  | 0.0264(6)  | 0.0353(7)  | -0.0108(6) | -0.0050(6) | 0.0038(5)  |
| C2   | 0.0338(8)  | 0.0292(7)  | 0.0364(8)  | -0.0094(7) | -0.0063(6) | 0.0026(6)  |
| C3   | 0.0286(7)  | 0.0308(7)  | 0.0343(7)  | -0.0115(6) | -0.0055(6) | 0.0063(6)  |
| C4   | 0.0310(7)  | 0.0289(7)  | 0.0403(8)  | -0.0117(6) | -0.0012(6) | 0.0023(6)  |
| O4   | 0.0399(6)  | 0.0493(6)  | 0.0739(7)  | -0.0360(6) | -0.0187(5) | 0.0180(5)  |
| C11  | 0.0282(7)  | 0.0316(7)  | 0.0310(7)  | -0.0105(6) | -0.0037(5) | 0.0050(6)  |
| C12  | 0.0335(8)  | 0.0368(8)  | 0.0557(9)  | -0.0175(7) | -0.0119(7) | 0.0058(6)  |
| C13  | 0.0342(8)  | 0.0539(9)  | 0.0577(10) | -0.0208(8) | -0.0130(7) | 0.0013(7)  |
| C14  | 0.0291(8)  | 0.0620(10) | 0.0389(8)  | -0.0109(7) | -0.0077(6) | 0.0153(7)  |
| C15  | 0.0424(9)  | 0.0437(8)  | 0.0456(9)  | -0.0127(7) | -0.0079(7) | 0.0179(7)  |
| C16  | 0.0342(8)  | 0.0365(7)  | 0.0408(8)  | -0.0125(6) | -0.0070(6) | 0.0074(6)  |
| C21  | 0.0204(6)  | 0.0325(7)  | 0.0320(7)  | -0.0115(6) | -0.0070(5) | 0.0017(5)  |
| C22  | 0.0362(8)  | 0.0391(7)  | 0.0384(8)  | -0.0087(6) | -0.0074(6) | 0.0075(6)  |
| C23  | 0.0434(9)  | 0.0646(10) | 0.0332(8)  | -0.0153(7) | 0.0002(7)  | 0.0093(8)  |
| C24  | 0.0389(8)  | 0.0672(10) | 0.0448(9)  | -0.0305(8) | -0.0082(7) | 0.0180(8)  |
| C25  | 0.0373(8)  | 0.0460(8)  | 0.0512(9)  | -0.0230(7) | -0.0110(7) | 0.0160(7)  |
| C26  | 0.0318(7)  | 0.0355(7)  | 0.0347(7)  | -0.0122(6) | -0.0069(6) | 0.0071(6)  |
| C31  | 0.0315(7)  | 0.0269(6)  | 0.0334(7)  | -0.0130(6) | 0.0002(6)  | 0.0058(6)  |
| C32  | 0.0337(8)  | 0.0319(7)  | 0.0428(8)  | -0.0156(6) | 0.0021(6)  | 0.0011(6)  |
| C33  | 0.0504(9)  | 0.0336(7)  | 0.0432(9)  | -0.0084(7) | 0.0131(7)  | -0.0023(7) |
| C34  | 0.0615(10) | 0.0376(8)  | 0.0332(8)  | -0.0043(7) | 0.0027(7)  | 0.0083(7)  |
| C35  | 0.0455(9)  | 0.0366(7)  | 0.0344(8)  | -0.0114(6) | -0.0055(6) | 0.0099(7)  |
| C36  | 0.0333(7)  | 0.0276(6)  | 0.0321(7)  | -0.0131(6) | -0.0027(6) | 0.0069(6)  |
| C41  | 0.0302(7)  | 0.0275(6)  | 0.0324(7)  | -0.0086(6) | -0.0040(6) | 0.0005(5)  |
| C42  | 0.0400(8)  | 0.0377(8)  | 0.0429(8)  | -0.0162(7) | -0.0046(7) | 0.0061(6)  |
| C43  | 0.0507(9)  | 0.0471(8)  | 0.0389(8)  | -0.0192(7) | -0.0133(7) | 0.0022(7)  |
| C44  | 0.0383(8)  | 0.0405(8)  | 0.0410(8)  | -0.0064(7) | -0.0108(7) | 0.0024(7)  |
| C45  | 0.0417(9)  | 0.0540(9)  | 0.0559(9)  | -0.0254(8) | -0.0171(7) | 0.0195(7)  |
| C46  | 0.0415(9)  | 0.0470(8)  | 0.0491(9)  | -0.0259(7) | -0.0144(7) | 0.0144(7)  |
| C47  | 0.0530(10) | 0.0652(10) | 0.0625(11) | -0.0144(9) | -0.0283(8) | 0.0097(8)  |

Table 5: Bond lengths ( $\text{\AA}$ ) and angles (deg) for **11e**.

|         |            |         |            |
|---------|------------|---------|------------|
| C1-C31  | 1.5252(16) | C13-C14 | 1.3746(19) |
| C1-C11  | 1.5321(16) | C14-C15 | 1.3762(18) |
| C1-C2   | 1.5466(16) | C15-C16 | 1.3820(17) |
| C1-C21  | 1.5483(16) | C21-C26 | 1.3857(16) |
| C2-C3   | 1.5255(17) | C21-C22 | 1.3899(17) |
| C3-C36  | 1.5194(17) | C22-C23 | 1.3805(18) |
| C3-C4   | 1.5268(16) | C23-C24 | 1.3755(19) |
| C4-O4   | 1.2213(14) | C24-C25 | 1.3673(19) |
| C4-C41  | 1.4786(17) | C25-C26 | 1.3867(17) |
| C11-C16 | 1.3838(16) | C31-C32 | 1.3839(16) |
| C11-C12 | 1.3895(16) | C31-C36 | 1.3919(17) |
| C12-C13 | 1.3774(18) | C32-C33 | 1.3814(17) |

|             |            |
|-------------|------------|
| C33-C34     | 1.3756(19) |
| C34-C35     | 1.3837(18) |
| C35-C36     | 1.3762(17) |
| C41-C46     | 1.3914(17) |
| C41-C42     | 1.3933(16) |
| C42-C43     | 1.3699(18) |
| C43-C44     | 1.3869(19) |
| C44-C45     | 1.3762(18) |
| C44-C47     | 1.5037(19) |
| C45-C46     | 1.3789(18) |
| C31-C1-C11  | 113.57(10) |
| C31-C1-C2   | 100.32(10) |
| C11-C1-C2   | 114.47(10) |
| C31-C1-C21  | 110.10(9)  |
| C11-C1-C21  | 109.09(9)  |
| C2-C1-C21   | 108.98(10) |
| C3-C2-C1    | 106.47(10) |
| C36-C3-C2   | 102.00(10) |
| C36-C3-C4   | 110.13(10) |
| C2-C3-C4    | 113.34(10) |
| O4-C4-C41   | 119.97(11) |
| O4-C4-C3    | 119.42(11) |
| C41-C4-C3   | 120.52(11) |
| C16-C11-C12 | 117.58(12) |
| C16-C11-C1  | 123.30(11) |
| C12-C11-C1  | 119.11(10) |
| C13-C12-C11 | 121.47(12) |
| C14-C13-C12 | 120.16(13) |
| C13-C14-C15 | 119.28(13) |
| C14-C15-C16 | 120.49(12) |
| C15-C16-C11 | 121.01(12) |
| C26-C21-C22 | 117.29(12) |
| C26-C21-C1  | 123.60(11) |
| C22-C21-C1  | 119.11(11) |
| C23-C22-C21 | 121.43(12) |
| C24-C23-C22 | 120.38(13) |
| C25-C24-C23 | 119.08(13) |
| C24-C25-C26 | 120.79(13) |
| C21-C26-C25 | 121.04(12) |
| C32-C31-C36 | 119.79(12) |
| C32-C31-C1  | 129.59(11) |
| C36-C31-C1  | 110.50(10) |
| C33-C32-C31 | 119.36(12) |
| C34-C33-C32 | 120.53(13) |
| C33-C34-C35 | 120.55(13) |
| C36-C35-C34 | 119.12(13) |
| C35-C36-C31 | 120.63(12) |
| C35-C36-C3  | 128.89(11) |
| C31-C36-C3  | 110.47(11) |
| C46-C41-C42 | 117.82(12) |
| C46-C41-C4  | 123.82(11) |
| C42-C41-C4  | 118.37(11) |
| C43-C42-C41 | 121.13(12) |
| C42-C43-C44 | 120.96(13) |
| C45-C44-C43 | 118.09(13) |
| C45-C44-C47 | 120.87(13) |
| C43-C44-C47 | 121.03(13) |
| C44-C45-C46 | 121.57(13) |
| C45-C46-C41 | 120.42(13) |

(3,3-Diphenyl-indan-1-yl)-(4-methoxy-phenyl)-methanone (11f)

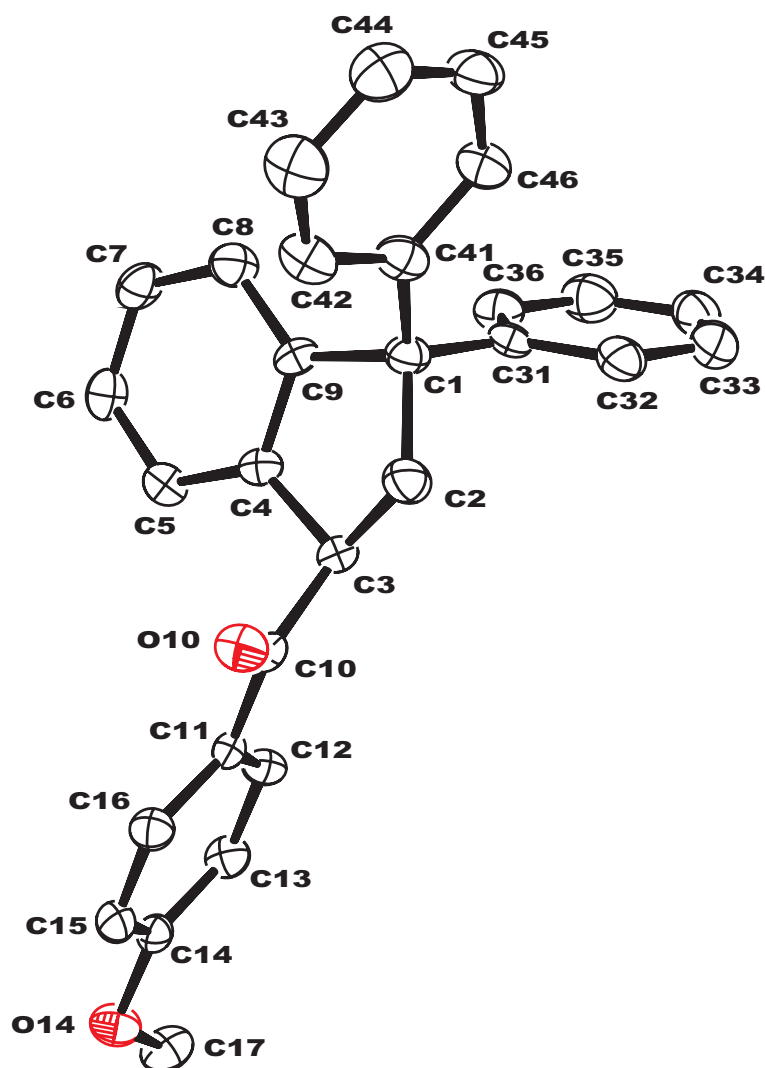

Table 1: Crystal data and structure refinement for 11f.

|                                 |                                                |               |
|---------------------------------|------------------------------------------------|---------------|
| Empirical formula               | C <sub>29</sub> H <sub>24</sub> O <sub>2</sub> |               |
| Formula weight                  | 404.48                                         |               |
| Temperature                     | 200(2) K                                       |               |
| Wavelength                      | 0.71073 Å                                      |               |
| Crystal system                  | orthorhombic                                   |               |
| Space group                     | Pccn                                           |               |
| Z                               | 8                                              |               |
| Unit cell dimensions            | a = 15.277(3) Å                                | α = 90.0 deg. |
|                                 | b = 37.640(8) Å                                | β = 90.0 deg. |
|                                 | c = 7.251(2) Å                                 | γ = 90.0 deg. |
| Volume                          | 4169.4(15) Å <sup>3</sup>                      |               |
| Density (calculated)            | 1.29 g/cm <sup>3</sup>                         |               |
| Absorption coefficient          | 0.08 mm <sup>-1</sup>                          |               |
| Crystal shape                   | plates                                         |               |
| Crystal size                    | 0.18 x 0.12 x 0.05 mm <sup>3</sup>             |               |
| Crystal colour                  | colourless                                     |               |
| Theta range for data collection | 1.4 to 20.8 deg.                               |               |
| Index ranges                    | -15 ≤ h ≤ 15, -37 ≤ k ≤ 24, -6 ≤ l ≤ 7         |               |
| Reflections collected           | 10547                                          |               |
| Independent reflections         | 2173 (R(int) = 0.0737)                         |               |
| Observed reflections            | 1621 (I > 2σ(I))                               |               |
| Absorption correction           | Semi-empirical from equivalents                |               |
| Max. and min. transmission      | 1.00 and 0.99                                  |               |
| Refinement method               | Full-matrix least-squares on F <sup>2</sup>    |               |

|                                      |                                 |
|--------------------------------------|---------------------------------|
| Data/restraints/parameters           | 2173 / 0 / 281                  |
| Goodness-of-fit on $F^2$             | 1.08                            |
| Final R indices ( $I > 2\sigma(I)$ ) | R1 = 0.061, wR2 = 0.133         |
| Largest diff. peak and hole          | 0.21 and -0.20 eÅ <sup>-3</sup> |

Table 2: Atomic coordinates and equivalent isotropic displacement parameters (Å<sup>2</sup>) for **11f**.  $U_{eq}$  is defined as one third of the trace of the orthogonalized  $U_{ij}$  tensor.

| Atom | x         | y         | z          | $U_{eq}$   |
|------|-----------|-----------|------------|------------|
| O10  | 0.5809(2) | 0.4534(1) | 0.1516(4)  | 0.0303(8)  |
| O14  | 0.3401(2) | 0.5751(1) | 0.4487(4)  | 0.0305(8)  |
| C1   | 0.4946(3) | 0.3515(1) | 0.1048(6)  | 0.0261(11) |
| C2   | 0.5365(3) | 0.3830(1) | 0.2135(7)  | 0.0326(12) |
| C3   | 0.4668(3) | 0.4127(1) | 0.2201(6)  | 0.0247(11) |
| C4   | 0.4129(3) | 0.4053(1) | 0.0496(6)  | 0.0216(11) |
| C5   | 0.3547(3) | 0.4277(1) | -0.0429(6) | 0.0240(11) |
| C6   | 0.3170(3) | 0.4161(1) | -0.2036(6) | 0.0289(12) |
| C7   | 0.3352(3) | 0.3824(1) | -0.2730(7) | 0.0319(12) |
| C8   | 0.3917(3) | 0.3601(1) | -0.1823(6) | 0.0317(12) |
| C9   | 0.4306(3) | 0.3716(1) | -0.0187(6) | 0.0234(11) |
| C10  | 0.5070(3) | 0.4498(1) | 0.2135(6)  | 0.0214(11) |
| C11  | 0.4576(3) | 0.4814(1) | 0.2771(6)  | 0.0191(10) |
| C12  | 0.3779(3) | 0.4798(1) | 0.3692(6)  | 0.0273(12) |
| C13  | 0.3362(3) | 0.5105(1) | 0.4278(6)  | 0.0269(12) |
| C14  | 0.3740(3) | 0.5430(1) | 0.3945(6)  | 0.0226(11) |
| C15  | 0.4529(3) | 0.5450(1) | 0.3022(6)  | 0.0262(11) |
| C16  | 0.4934(3) | 0.5144(1) | 0.2433(6)  | 0.0251(11) |
| C17  | 0.2674(3) | 0.5743(1) | 0.5735(6)  | 0.0339(12) |
| C31  | 0.4472(3) | 0.3266(1) | 0.2375(6)  | 0.0278(12) |
| C32  | 0.4932(3) | 0.3115(1) | 0.3836(7)  | 0.0354(13) |
| C33  | 0.4538(4) | 0.2882(1) | 0.5068(7)  | 0.0448(14) |
| C34  | 0.3665(4) | 0.2797(1) | 0.4879(7)  | 0.0444(15) |
| C35  | 0.3189(3) | 0.2951(1) | 0.3449(7)  | 0.0422(14) |
| C36  | 0.3587(3) | 0.3180(1) | 0.2220(7)  | 0.0324(12) |
| C41  | 0.5629(3) | 0.3318(1) | -0.0151(7) | 0.0300(12) |
| C42  | 0.6114(3) | 0.3508(1) | -0.1422(7) | 0.0360(13) |
| C43  | 0.6722(3) | 0.3340(1) | -0.2543(7) | 0.0431(14) |
| C44  | 0.6856(3) | 0.2981(1) | -0.2421(7) | 0.0410(14) |
| C45  | 0.6374(3) | 0.2786(1) | -0.1195(7) | 0.0379(14) |
| C46  | 0.5758(3) | 0.2952(1) | -0.0059(7) | 0.0340(13) |

Table 3: Hydrogen coordinates and isotropic displacement parameters (Å<sup>2</sup>) for **11f**.

| Atom | x      | y      | z       | $U_{eq}$ |
|------|--------|--------|---------|----------|
| H2A  | 0.5525 | 0.3754 | 0.3398  | 0.039    |
| H2B  | 0.5900 | 0.3915 | 0.1501  | 0.039    |
| H3   | 0.4298 | 0.4101 | 0.3331  | 0.030    |
| H5   | 0.3414 | 0.4506 | 0.0047  | 0.029    |
| H6   | 0.2780 | 0.4312 | -0.2685 | 0.035    |
| H7   | 0.3082 | 0.3748 | -0.3843 | 0.038    |
| H8   | 0.4041 | 0.3371 | -0.2301 | 0.038    |
| H12  | 0.3517 | 0.4573 | 0.3925  | 0.033    |
| H13  | 0.2817 | 0.5090 | 0.4905  | 0.032    |
| H15  | 0.4791 | 0.5675 | 0.2794  | 0.031    |
| H16  | 0.5471 | 0.5161 | 0.1779  | 0.030    |
| H17A | 0.2159 | 0.5647 | 0.5102  | 0.051    |



|      |        |        |         |       |
|------|--------|--------|---------|-------|
| H17B | 0.2547 | 0.5984 | 0.6164  | 0.051 |
| H17C | 0.2818 | 0.5592 | 0.6794  | 0.051 |
| H32  | 0.5532 | 0.3173 | 0.3996  | 0.042 |
| H33  | 0.4871 | 0.2781 | 0.6042  | 0.054 |
| H34  | 0.3392 | 0.2637 | 0.5711  | 0.053 |
| H35  | 0.2584 | 0.2898 | 0.3317  | 0.051 |
| H36  | 0.3251 | 0.3282 | 0.1251  | 0.039 |
| H42  | 0.6029 | 0.3757 | -0.1531 | 0.043 |
| H43  | 0.7051 | 0.3475 | -0.3405 | 0.052 |
| H44  | 0.7279 | 0.2868 | -0.3181 | 0.049 |
| H45  | 0.6459 | 0.2537 | -0.1114 | 0.046 |
| H46  | 0.5424 | 0.2814 | 0.0782  | 0.041 |

Table 4: Anisotropic displacement parameters ( $\text{\AA}^2$ ) for **11f**. The anisotropic displacement factor exponent takes the form:  $-2 \pi^2 (h^2 a^2 U_{11} + \dots + 2 h k a^* b^* U_{12})$

| Atom | $U_{11}$   | $U_{22}$   | $U_{33}$ | $U_{23}$    | $U_{13}$   | $U_{12}$    |
|------|------------|------------|----------|-------------|------------|-------------|
| O10  | 0.0263(19) | 0.0298(19) | 0.035(2) | -0.0033(15) | 0.0051(16) | -0.0013(16) |
| O14  | 0.0273(18) | 0.0274(19) | 0.037(2) | -0.0067(16) | 0.0034(16) | 0.0056(15)  |
| C1   | 0.027(3)   | 0.024(2)   | 0.028(3) | -0.005(2)   | -0.003(2)  | 0.004(2)    |
| C2   | 0.035(3)   | 0.027(3)   | 0.036(3) | -0.002(2)   | -0.009(3)  | 0.001(2)    |
| C3   | 0.031(3)   | 0.023(3)   | 0.020(3) | -0.003(2)   | -0.002(2)  | -0.001(2)   |
| C4   | 0.018(2)   | 0.024(3)   | 0.023(3) | -0.004(2)   | 0.004(2)   | -0.002(2)   |
| C5   | 0.016(2)   | 0.024(2)   | 0.033(3) | 0.000(2)    | 0.002(2)   | 0.000(2)    |
| C6   | 0.020(3)   | 0.037(3)   | 0.029(3) | 0.006(2)    | -0.003(2)  | 0.000(2)    |
| C7   | 0.030(3)   | 0.039(3)   | 0.027(3) | -0.002(3)   | -0.009(2)  | -0.005(3)   |
| C8   | 0.032(3)   | 0.029(3)   | 0.034(3) | -0.004(3)   | -0.002(3)  | 0.000(2)    |
| C9   | 0.022(2)   | 0.028(3)   | 0.021(3) | -0.005(2)   | -0.002(2)  | -0.002(2)   |
| C10  | 0.023(3)   | 0.026(3)   | 0.016(3) | -0.001(2)   | -0.002(2)  | -0.001(2)   |
| C11  | 0.022(2)   | 0.020(3)   | 0.015(2) | 0.001(2)    | -0.001(2)  | 0.000(2)    |
| C12  | 0.033(3)   | 0.022(3)   | 0.027(3) | -0.004(2)   | -0.002(2)  | -0.006(2)   |
| C13  | 0.024(3)   | 0.031(3)   | 0.026(3) | -0.002(2)   | 0.004(2)   | -0.002(2)   |
| C14  | 0.027(3)   | 0.022(3)   | 0.019(3) | 0.000(2)    | -0.003(2)  | 0.004(2)    |
| C15  | 0.031(3)   | 0.024(3)   | 0.024(3) | 0.002(2)    | -0.002(2)  | -0.005(2)   |
| C16  | 0.024(2)   | 0.025(3)   | 0.026(3) | -0.002(2)   | 0.002(2)   | 0.001(2)    |
| C17  | 0.027(3)   | 0.043(3)   | 0.031(3) | -0.010(2)   | 0.003(2)   | 0.011(2)    |
| C31  | 0.037(3)   | 0.018(2)   | 0.028(3) | -0.005(2)   | 0.002(2)   | 0.011(2)    |
| C32  | 0.040(3)   | 0.028(3)   | 0.038(3) | -0.005(3)   | -0.006(3)  | 0.010(3)    |
| C33  | 0.066(4)   | 0.034(3)   | 0.034(3) | -0.002(3)   | 0.000(3)   | 0.016(3)    |
| C34  | 0.071(4)   | 0.028(3)   | 0.034(3) | 0.002(3)    | 0.013(3)   | 0.001(3)    |
| C35  | 0.045(3)   | 0.037(3)   | 0.045(4) | -0.004(3)   | 0.007(3)   | -0.007(3)   |
| C36  | 0.033(3)   | 0.031(3)   | 0.033(3) | -0.006(2)   | 0.004(2)   | 0.000(2)    |
| C41  | 0.025(3)   | 0.027(3)   | 0.039(3) | -0.005(2)   | -0.005(2)  | -0.003(2)   |
| C42  | 0.033(3)   | 0.028(3)   | 0.047(3) | -0.003(3)   | 0.002(3)   | 0.001(3)    |
| C43  | 0.035(3)   | 0.043(4)   | 0.051(4) | 0.001(3)    | 0.007(3)   | -0.008(3)   |
| C44  | 0.033(3)   | 0.049(4)   | 0.041(3) | -0.005(3)   | 0.005(3)   | 0.004(3)    |
| C45  | 0.044(3)   | 0.029(3)   | 0.041(3) | -0.009(3)   | -0.002(3)  | 0.010(3)    |
| C46  | 0.035(3)   | 0.027(3)   | 0.039(3) | -0.003(2)   | 0.001(3)   | -0.003(2)   |

Table 5: Bond lengths ( $\text{\AA}$ ) and angles (deg) for **11f**.

|         |          |        |          |
|---------|----------|--------|----------|
| O10-C10 | 1.222(5) | C2-H2A | 0.9900   |
| O14-C14 | 1.373(5) | C2-H2B | 0.9900   |
| O14-C17 | 1.433(5) | C3-C4  | 1.511(6) |
| C1-C9   | 1.526(6) | C3-C10 | 1.526(6) |
| C1-C31  | 1.527(6) | C3-H3  | 1.0000   |
| C1-C41  | 1.549(6) | C4-C9  | 1.388(6) |
| C1-C2   | 1.561(6) | C4-C5  | 1.397(6) |
| C2-C3   | 1.546(6) | C5-C6  | 1.371(6) |

|             |          |               |          |
|-------------|----------|---------------|----------|
| C5-H5       | 0.9500   | C5-C4-C3      | 128.9(4) |
| C6-C7       | 1.391(6) | C6-C5-C4      | 118.9(4) |
| C6-H6       | 0.9500   | C6-C5-H5      | 120.5    |
| C7-C8       | 1.373(6) | C4-C5-H5      | 120.5    |
| C7-H7       | 0.9500   | C5-C6-C7      | 120.9(4) |
| C8-C9       | 1.396(6) | C5-C6-H6      | 119.6    |
| C8-H8       | 0.9500   | C7-C6-H6      | 119.6    |
| C10-C11     | 1.481(6) | C8-C7-C6      | 120.7(4) |
| C11-C16     | 1.382(5) | C8-C7-H7      | 119.7    |
| C11-C12     | 1.390(6) | C6-C7-H7      | 119.7    |
| C12-C13     | 1.386(6) | C7-C8-C9      | 119.0(4) |
| C12-H12     | 0.9500   | C7-C8-H8      | 120.5    |
| C13-C14     | 1.376(6) | C9-C8-H8      | 120.5    |
| C13-H13     | 0.9500   | C4-C9-C8      | 120.3(4) |
| C14-C15     | 1.381(6) | C4-C9-C1      | 111.6(4) |
| C15-C16     | 1.374(6) | C8-C9-C1      | 128.1(4) |
| C15-H15     | 0.9500   | O10-C10-C11   | 119.7(4) |
| C16-H16     | 0.9500   | O10-C10-C3    | 119.1(4) |
| C17-H17A    | 0.9800   | C11-C10-C3    | 121.2(4) |
| C17-H17B    | 0.9800   | C16-C11-C12   | 118.0(4) |
| C17-H17C    | 0.9800   | C16-C11-C10   | 117.8(4) |
| C31-C32     | 1.391(6) | C12-C11-C10   | 124.2(4) |
| C31-C36     | 1.394(6) | C13-C12-C11   | 121.0(4) |
| C32-C33     | 1.389(7) | C13-C12-H12   | 119.5    |
| C32-H32     | 0.9500   | C11-C12-H12   | 119.5    |
| C33-C34     | 1.379(7) | C14-C13-C12   | 119.6(4) |
| C33-H33     | 0.9500   | C14-C13-H13   | 120.2    |
| C34-C35     | 1.392(7) | C12-C13-H13   | 120.2    |
| C34-H34     | 0.9500   | O14-C14-C13   | 125.2(4) |
| C35-C36     | 1.382(6) | O14-C14-C15   | 114.8(4) |
| C35-H35     | 0.9500   | C13-C14-C15   | 120.0(4) |
| C36-H36     | 0.9500   | C16-C15-C14   | 119.9(4) |
| C41-C42     | 1.382(6) | C16-C15-H15   | 120.1    |
| C41-C46     | 1.392(6) | C14-C15-H15   | 120.1    |
| C42-C43     | 1.387(6) | C15-C16-C11   | 121.4(4) |
| C42-H42     | 0.9500   | C15-C16-H16   | 119.3    |
| C43-C44     | 1.370(7) | C11-C16-H16   | 119.3    |
| C43-H43     | 0.9500   | O14-C17-H17A  | 109.5    |
| C44-C45     | 1.366(7) | O14-C17-H17B  | 109.5    |
| C44-H44     | 0.9500   | H17A-C17-H17B | 109.5    |
| C45-C46     | 1.398(6) | O14-C17-H17C  | 109.5    |
| C45-H45     | 0.9500   | H17A-C17-H17C | 109.5    |
| C46-H46     | 0.9500   | H17B-C17-H17C | 109.5    |
|             |          | C32-C31-C36   | 117.2(4) |
| C14-O14-C17 | 117.0(3) | C32-C31-C1    | 119.4(4) |
| C9-C1-C31   | 111.8(3) | C36-C31-C1    | 123.3(4) |
| C9-C1-C41   | 109.9(4) | C33-C32-C31   | 121.9(5) |
| C31-C1-C41  | 112.2(3) | C33-C32-H32   | 119.1    |
| C9-C1-C2    | 100.5(3) | C31-C32-H32   | 119.1    |
| C31-C1-C2   | 110.1(4) | C34-C33-C32   | 120.1(5) |
| C41-C1-C2   | 111.7(4) | C34-C33-H33   | 120.0    |
| C3-C2-C1    | 106.4(3) | C32-C33-H33   | 120.0    |
| C3-C2-H2A   | 110.5    | C33-C34-C35   | 118.9(5) |
| C1-C2-H2A   | 110.5    | C33-C34-H34   | 120.5    |
| C3-C2-H2B   | 110.5    | C35-C34-H34   | 120.5    |
| C1-C2-H2B   | 110.5    | C36-C35-C34   | 120.7(5) |
| H2A-C2-H2B  | 108.6    | C36-C35-H35   | 119.7    |
| C4-C3-C10   | 111.3(3) | C34-C35-H35   | 119.7    |
| C4-C3-C2    | 102.5(3) | C35-C36-C31   | 121.2(5) |
| C10-C3-C2   | 112.5(3) | C35-C36-H36   | 119.4    |
| C4-C3-H3    | 110.1    | C31-C36-H36   | 119.4    |
| C10-C3-H3   | 110.1    | C42-C41-C46   | 117.9(4) |
| C2-C3-H3    | 110.1    | C42-C41-C1    | 119.2(4) |
| C9-C4-C5    | 120.2(4) | C46-C41-C1    | 122.9(4) |
| C9-C4-C3    | 110.8(4) | C41-C42-C43   | 120.9(4) |

|             |          |
|-------------|----------|
| C41-C42-H42 | 119.5    |
| C43-C42-H42 | 119.5    |
| C44-C43-C42 | 120.8(5) |
| C44-C43-H43 | 119.6    |
| C42-C43-H43 | 119.6    |
| C45-C44-C43 | 119.3(5) |
| C45-C44-H44 | 120.3    |
| C43-C44-H44 | 120.3    |
| C44-C45-C46 | 120.5(4) |
| C44-C45-H45 | 119.8    |
| C46-C45-H45 | 119.8    |
| C41-C46-C45 | 120.5(5) |
| C41-C46-H46 | 119.7    |
| C45-C46-H46 | 119.7    |

## II. Computational Studies on the intermediates and products

**General remarks.** All calculations were carried out on an AMD Athlon64 X2 architecture using Gaussian 03: x86–Linux–G03 Revision C.01:

Frisch, M. J.; Trucks, G. W.; Schlegel, H. B.; Scuseria, G. E.; Robb, M. A.; Cheeseman, J. R.; Montgomery, Jr., J. A.; Vreven, T.; Kudin, K. N.; Burant, J. C.; Millam, J. M.; Iyengar, S. S.; Tomasi, J.; Barone, V.; Mennucci, B.; Cossi, M.; Scalmani, G.; Rega, N.; Petersson, G. A.; Nakatsuji, H.; Hada, M.; Ehara, M.; Toyota, K.; Fukuda, R.; Hasegawa, J.; Ishida, M.; Nakajima, T.; Honda, Y.; Kitao, O.; Nakai, H.; Klene, M.; Li, X.; Knox, J. E.; Hratchian, H. P.; Cross, J. B.; Bakken, V.; Adamo, C.; Jaramillo, J.; Gomperts, R.; Stratmann, R. E.; Yazyev, O.; Austin, A. J.; Cammi, R.; Pomelli, C.; Ochterski, J. W.; Ayala, P. Y.; Morokuma, K.; Voth, G. A.; Salvador, P.; Dannenberg, J. J.; Zakrzewski, V. G.; Dapprich, S.; Daniels, A. D.; Strain, M. C.; Farkas, O.; Malick, D. K.; Rabuck, A. D.; Raghavachari, K.; Foresman, J. B.; Ortiz, J. V.; Cui, Q.; Baboul, A. G.; Clifford, S.; Cioslowski, J.; Stefanov, B. B.; Liu, G.; Liashenko, A.; Piskorz, P.; Komaromi, I.; Martin, R. L.; Fox, D. J.; Keith, T.; AlLaham, M. A.; Peng, C. Y.; Nanayakkara, A.; Challacombe, M.; Gill, P. M. W.; Johnson, B.; Chen, W.; Wong, M. W.; Gonzalez, C.; Pople, J. A. Gaussian 03, Revision C.01, *Gaussian, Inc., Wallingford CT*, 2004.

Geometry optimizations were carried out using the restricted Becke Perdew 86 Functionals [RBP86/6–31+G(d,p)]:

J. P. Perdew, *Phys. Rev. B* 1986, **33**, 8822.

Single point energy calculation were carried out using the *Møller–Plesset* correlation energy correction truncated at second-order [RMP2/6-311++G (2d,2p)//RBP86/6–31+G(d,p)]:

C. Møller, M. S. Plesset *Phys. Rev.*, 1934, **46**, 618.

M. Head-Gordon, J. A. Pople, M. J. Frisch, *Chem. Phys. Lett.*, 1988, **153**, 503.

M. J. Frisch, M. Head-Gordon, J. A. Pople, *Chem. Phys. Lett.*, 1990, **166**, 275.

M. J. Frisch, M. Head-Gordon, J. A. Pople, *Chem. Phys. Lett.*, 1990, **166**, 281.

M. Head-Gordon, T. Head-Gordon, *Chem. Phys. Lett.*, 1994, **220**, 122.

S. Saebo, J. Almlöf, *Chem. Phys. Lett.*, 1989, **154**, 83.

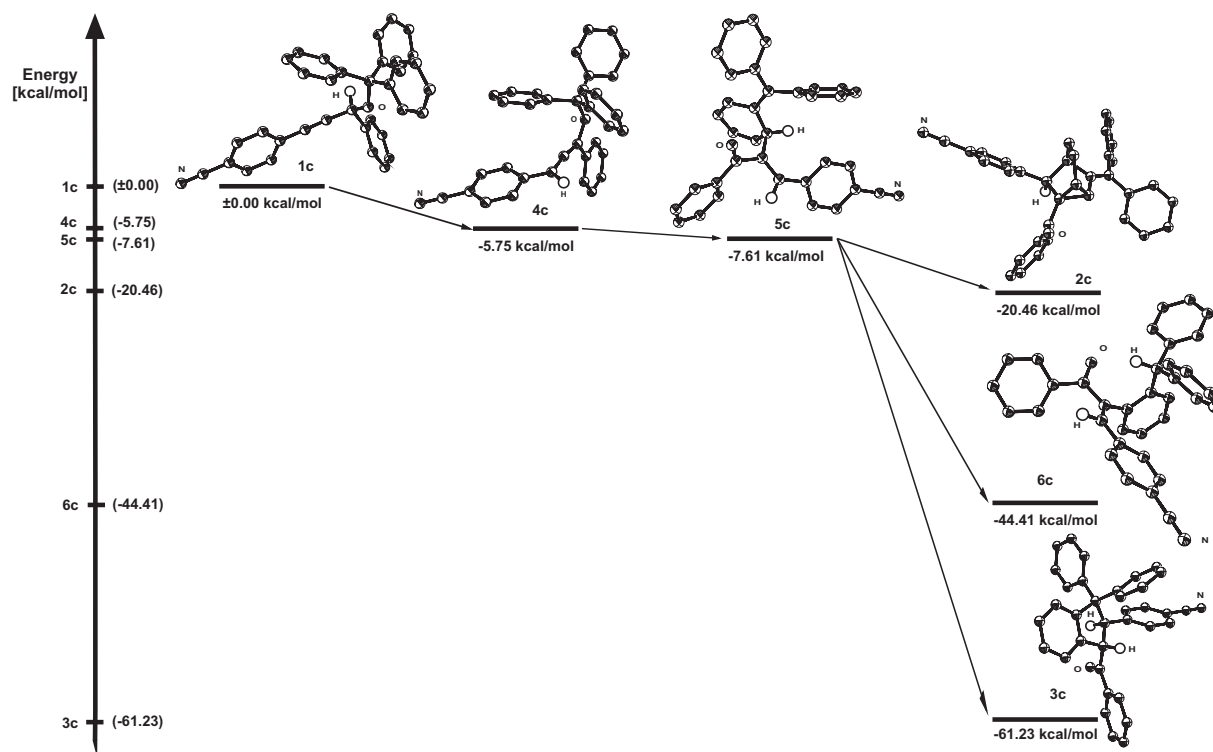

### Propargyl trityl ether 1c

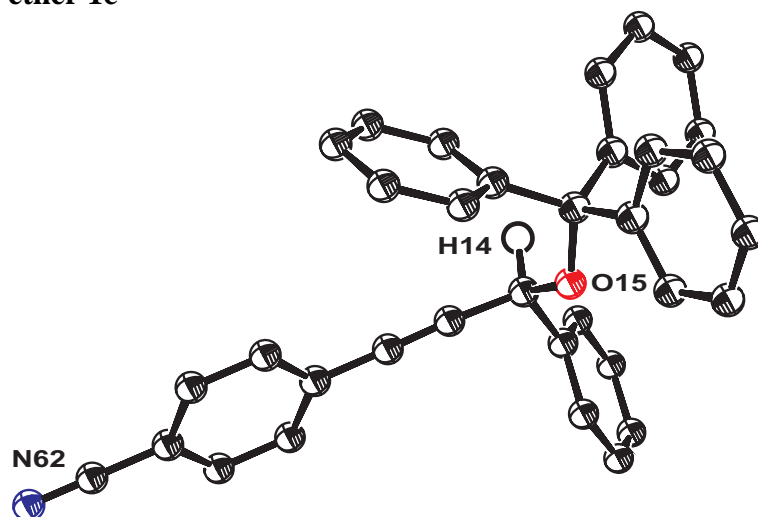

| ATOM | X           | Y           | Z           |
|------|-------------|-------------|-------------|
| C    | 1.12368800  | 0.87587900  | -0.24086500 |
| C    | 2.32365400  | 0.63036800  | -0.15618200 |
| C    | 3.71288700  | 0.31797800  | -0.06876600 |
| C    | 6.46849300  | -0.30565600 | 0.10256400  |
| C    | 4.14824200  | -1.03399100 | -0.06805800 |
| C    | 4.68333900  | 1.35136500  | 0.01897600  |
| C    | 6.04352300  | 1.04559800  | 0.10164300  |
| C    | 5.50730900  | -1.34282900 | 0.01789800  |
| H    | 3.40153200  | -1.83002900 | -0.13835100 |
| H    | 4.35369600  | 2.39419300  | 0.02037300  |
| H    | 6.78689100  | 1.84512000  | 0.16747400  |
| H    | 5.83830100  | -2.38534000 | 0.01862800  |
| C    | -0.29459600 | 1.26415200  | -0.31551100 |
| H    | -0.65458700 | 1.13887100  | -1.35648900 |
| O    | -1.11300800 | 0.46705000  | 0.58210800  |
| C    | -1.79798700 | -0.70318600 | 0.03444600  |
| C    | -0.47003700 | 2.73200400  | 0.07779300  |
| C    | -0.79329200 | 5.43772000  | 0.80397500  |
| C    | -0.89983600 | 3.67612000  | -0.87250600 |
| C    | -0.19601200 | 3.15133500  | 1.39540900  |
| C    | -0.36360900 | 4.49616900  | 1.75746300  |
| C    | -1.05842600 | 5.02592100  | -0.51220400 |
| H    | -1.11622800 | 3.35424100  | -1.89766700 |
| H    | 0.14744600  | 2.41881200  | 2.13316000  |
| H    | -0.15349200 | 4.81278600  | 2.78461100  |
| H    | -1.39274500 | 5.75273300  | -1.26001100 |
| H    | -0.91905900 | 6.48795800  | 1.08730500  |
| C    | -2.56397300 | -1.29860000 | 1.24356100  |
| C    | -4.01828100 | -2.40661300 | 3.40823400  |
| C    | -3.33024400 | -2.47138600 | 1.07330500  |
| C    | -2.53812100 | -0.68669600 | 2.51108600  |
| C    | -3.26152800 | -1.23847600 | 3.58453300  |
| C    | -4.04811900 | -3.02283500 | 2.14430200  |

|   |             |             |             |
|---|-------------|-------------|-------------|
| H | -3.36596100 | -2.96213700 | 0.09541000  |
| H | -1.94753400 | 0.22005100  | 2.65525300  |
| H | -3.22816400 | -0.74776900 | 4.56333300  |
| H | -4.63409500 | -3.93506600 | 1.98953900  |
| H | -4.58082300 | -2.83424600 | 4.24479000  |
| C | -0.75367700 | -1.69967100 | -0.51966800 |
| C | 1.27399100  | -3.45281600 | -1.45929200 |
| C | -0.15041300 | -2.64040600 | 0.34267400  |
| C | -0.30193500 | -1.63928700 | -1.85631900 |
| C | 0.69919400  | -2.50721900 | -2.32349700 |
| C | 0.84959300  | -3.50976100 | -0.12017100 |
| H | -0.47124600 | -2.69550600 | 1.38695600  |
| H | -0.74126600 | -0.91549500 | -2.54991500 |
| H | 1.02655000  | -2.44288500 | -3.36659100 |
| H | 1.29125800  | -4.23952600 | 0.56717800  |
| H | 2.04338000  | -4.14058100 | -1.82650600 |
| C | -2.86617600 | -0.25719500 | -0.99689300 |
| C | -4.97887400 | 0.54773700  | -2.71355900 |
| C | -3.48606300 | 1.00122300  | -0.84204300 |
| C | -3.33800000 | -1.11381900 | -2.01501200 |
| C | -4.38355800 | -0.71492400 | -2.86534000 |
| C | -4.52539100 | 1.40352800  | -1.69547400 |
| H | -3.15000100 | 1.66387600  | -0.03960000 |
| H | -2.88956200 | -2.10272300 | -2.15138600 |
| H | -4.73018400 | -1.39670900 | -3.64939700 |
| H | -4.98651900 | 2.38727300  | -1.55683700 |
| H | -5.79126300 | 0.85942000  | -3.37832900 |
| C | 7.86502100  | -0.62234400 | 0.18839400  |
| N | 9.01186000  | -0.88286600 | 0.25869100  |

Energy RMP2 = -1475.0194704 Hartree

### Tentative Intermediate 4c

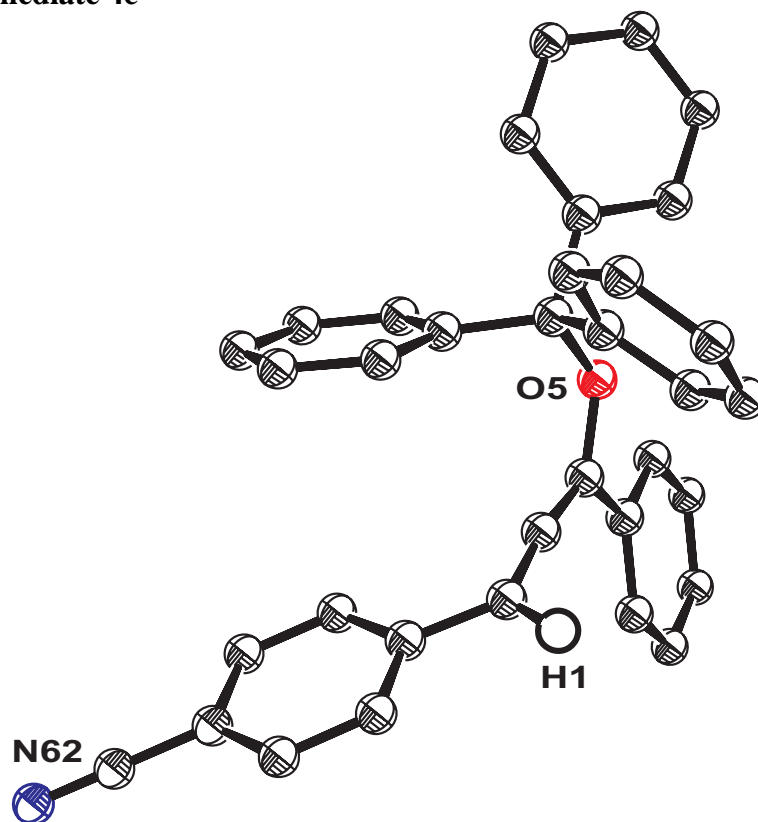

| ATOM | X           | Y           | Z           |
|------|-------------|-------------|-------------|
| H    | 1.75205900  | 0.47970500  | 2.63694200  |
| C    | 1.79300400  | 0.53140300  | 1.53504700  |
| C    | 0.70832700  | 0.93990300  | 0.88623500  |
| C    | -0.36145200 | 1.52565700  | 0.35272400  |
| O    | -1.52766800 | 0.89331400  | -0.05356600 |
| C    | -1.65692300 | -0.57013000 | -0.07791000 |
| C    | -3.06633700 | -0.78394800 | -0.68905600 |
| C    | -5.68779200 | -1.23471600 | -1.66130300 |
| C    | -4.11693600 | 0.09734600  | -0.35810500 |
| C    | -3.34835400 | -1.89825500 | -1.50372300 |
| C    | -4.64979000 | -2.12308400 | -1.98412000 |
| C    | -5.41401200 | -0.12211100 | -0.84720100 |
| H    | -3.91438600 | 0.96045200  | 0.28182800  |
| H    | -2.54764200 | -2.59237300 | -1.77731500 |
| H    | -4.84663000 | -2.99360400 | -2.61889800 |
| H    | -6.21443500 | 0.57854300  | -0.58628600 |
| H    | -6.70062400 | -1.40691200 | -2.04009200 |
| C    | -0.55774500 | -1.13993300 | -0.99829100 |
| C    | 1.35818800  | -2.13312000 | -2.83699700 |
| C    | -0.51840600 | -0.66818600 | -2.33060900 |
| C    | 0.39773500  | -2.09175300 | -0.59590200 |
| C    | 1.34301600  | -2.59103300 | -1.51097900 |
| C    | 0.43024900  | -1.15583900 | -3.24066800 |
| H    | -1.24778700 | 0.08172900  | -2.65316600 |
| H    | 0.41678000  | -2.44503900 | 0.43821300  |



|   |             |             |             |
|---|-------------|-------------|-------------|
| H | 2.07476200  | -3.33388100 | -1.17687000 |
| H | 0.43817000  | -0.77947500 | -4.26917200 |
| H | 2.09200400  | -2.52598900 | -3.54860000 |
| C | -1.71710400 | -1.14735500 | 1.35473400  |
| C | -2.03128700 | -2.23388100 | 3.95884900  |
| C | -1.80153100 | -0.30642700 | 2.48247800  |
| C | -1.83300500 | -2.54156400 | 1.55092100  |
| C | -1.97881000 | -3.08041600 | 2.83854800  |
| C | -1.95117900 | -0.84507400 | 3.77217900  |
| H | -1.75829400 | 0.77776900  | 2.35629900  |
| H | -1.83076600 | -3.21593500 | 0.68881300  |
| H | -2.06290200 | -4.16528200 | 2.96264000  |
| H | -2.01139100 | -0.16960700 | 4.63233100  |
| H | -2.14824200 | -2.65252000 | 4.96378900  |
| C | -0.44212100 | 2.99862100  | 0.12355400  |
| C | -0.59421700 | 5.79137000  | -0.32010500 |
| C | -1.49300400 | 3.54786800  | -0.64589900 |
| C | 0.52916800  | 3.86947900  | 0.66917300  |
| C | 0.45314400  | 5.25053000  | 0.44883300  |
| C | -1.56367600 | 4.93366000  | -0.86406000 |
| H | -2.24894200 | 2.88379000  | -1.07193500 |
| H | 1.34597000  | 3.45466200  | 1.26884300  |
| H | 1.21434000  | 5.90851700  | 0.88120900  |
| H | -2.38367200 | 5.34194600  | -1.46452500 |
| H | -0.65259300 | 6.87124300  | -0.49125300 |
| C | 3.07893600  | 0.12378300  | 0.93848000  |
| C | 5.59252900  | -0.62023300 | -0.13531900 |
| C | 4.11864300  | -0.33939700 | 1.78037200  |
| C | 3.32153000  | 0.20719100  | -0.45446600 |
| C | 4.55819400  | -0.15607200 | -0.98792000 |
| C | 5.36142100  | -0.71045300 | 1.25815500  |
| H | 3.94405600  | -0.40638900 | 2.86014000  |
| H | 2.52180500  | 0.56000300  | -1.11352900 |
| H | 4.73909900  | -0.08709800 | -2.06443100 |
| H | 6.15813700  | -1.06819700 | 1.91666500  |
| C | 6.86386700  | -0.99692400 | -0.68244800 |
| N | 7.90669300  | -1.30914400 | -1.13347400 |

Energy RMP2 = -1475.0286324 Hartree

Tentative intermediate 5c

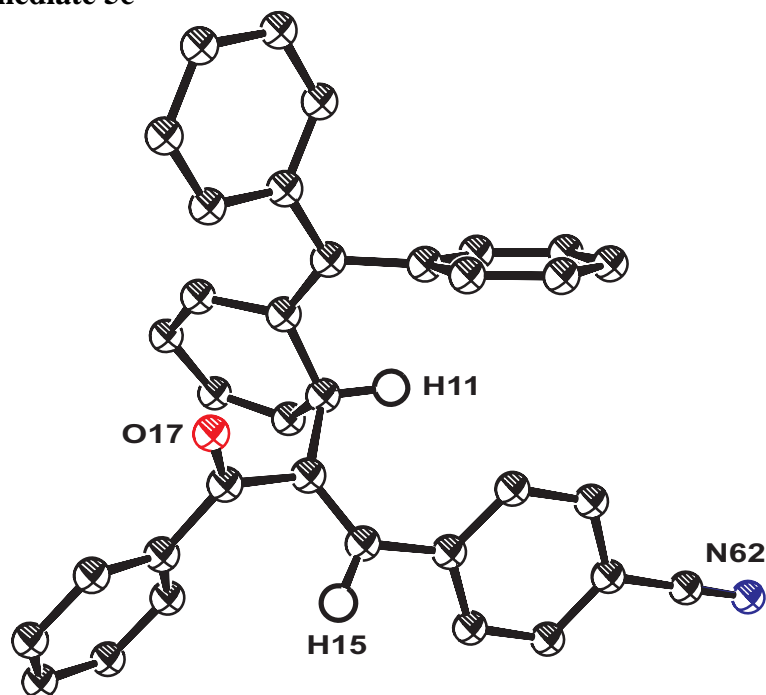

| ATOM | X           | Y           | Z           |
|------|-------------|-------------|-------------|
| C    | -2.37952100 | 0.53313000  | 1.76580900  |
| C    | -0.59751500 | 1.69037400  | 3.01008400  |
| C    | 0.04455000  | 0.22466600  | 1.07690700  |
| C    | 0.37806800  | 1.05841800  | 2.30769300  |
| C    | -1.40427500 | -0.28674200 | 1.06455800  |
| C    | -1.99947800 | 1.48339900  | 2.67904100  |
| H    | -0.34178900 | 2.33205400  | 3.86095600  |
| H    | 1.43799900  | 1.17755800  | 2.55774800  |
| H    | -2.76371900 | 2.03230800  | 3.23899900  |
| H    | -3.44150400 | 0.30880100  | 1.63626200  |
| H    | 0.73970100  | -0.62444000 | 1.02844300  |
| C    | -1.75513500 | -1.45763900 | 0.41351200  |
| C    | 0.38044500  | 1.15322100  | -0.12293200 |
| C    | 1.61261500  | 1.26744300  | -0.69440800 |
| H    | 1.74321300  | 2.09635300  | -1.40642700 |
| C    | -0.70212100 | 2.03864600  | -0.70930200 |
| O    | -1.65811100 | 1.50081300  | -1.28850800 |
| C    | 2.83658100  | 0.46521100  | -0.48699000 |
| C    | 5.26330900  | -0.97098500 | -0.14415000 |
| C    | 4.08367700  | 1.13878500  | -0.42684300 |
| C    | 2.83853600  | -0.94918900 | -0.41170600 |
| C    | 4.03039600  | -1.65967000 | -0.23877400 |
| C    | 5.28087800  | 0.44113200  | -0.24733200 |
| H    | 4.10610000  | 2.23076200  | -0.51267800 |
| H    | 1.90338300  | -1.50416200 | -0.52945800 |
| H    | 4.01404600  | -2.75193100 | -0.19074600 |
| H    | 6.23307300  | 0.97635500  | -0.19015100 |
| C    | -0.57626000 | 3.53194500  | -0.64864400 |

|   |             |             |             |
|---|-------------|-------------|-------------|
| C | -0.44550900 | 6.34743000  | -0.57748700 |
| C | -1.42953200 | 4.30875600  | -1.46698800 |
| C | 0.34021400  | 4.18221100  | 0.20791800  |
| C | 0.39961900  | 5.58411700  | 0.24628800  |
| C | -1.36038600 | 5.70628600  | -1.43538700 |
| H | -2.13699600 | 3.78851900  | -2.12025400 |
| H | 0.98805300  | 3.58479900  | 0.85624400  |
| H | 1.10475400  | 6.08159900  | 0.92037300  |
| H | -2.01810600 | 6.30110000  | -2.07780800 |
| H | -0.39355200 | 7.44111600  | -0.55114000 |
| C | -0.74244300 | -2.47910300 | 0.00312200  |
| C | 1.07736000  | -4.52015300 | -0.75700200 |
| C | -0.63811700 | -2.89193400 | -1.34651600 |
| C | 0.07528100  | -3.11895300 | 0.96652300  |
| C | 0.97348800  | -4.13163400 | 0.59055200  |
| C | 0.27062400  | -3.89324300 | -1.72394300 |
| H | -1.27483500 | -2.41530500 | -2.09903900 |
| H | -0.01849500 | -2.83103100 | 2.01972800  |
| H | 1.58410500  | -4.62526800 | 1.35438400  |
| H | 0.34405100  | -4.19008200 | -2.77561000 |
| H | 1.77376700  | -5.31275600 | -1.05028200 |
| C | -3.16555100 | -1.79928000 | 0.06884400  |
| C | -5.82737600 | -2.48468400 | -0.63190900 |
| C | -3.67697600 | -3.09308900 | 0.33528600  |
| C | -4.00664900 | -0.86377000 | -0.58326600 |
| C | -5.32368900 | -1.20616600 | -0.92804100 |
| C | -4.99702600 | -3.42782300 | -0.00006000 |
| H | -3.03266800 | -3.83471300 | 0.81959900  |
| H | -3.59934800 | 0.11794000  | -0.84556500 |
| H | -5.95486900 | -0.47292500 | -1.44190700 |
| H | -5.37768200 | -4.42901800 | 0.22900800  |
| H | -6.85520500 | -2.74905100 | -0.90221900 |
| C | 6.48656700  | -1.69841100 | 0.03765600  |
| N | 7.49050300  | -2.29590000 | 0.18956300  |

Energy RMP2 = -1475.0316008 Hartree

Tricyclo[3.2.1.0<sup>2,7</sup>]oct-3-ene 2c

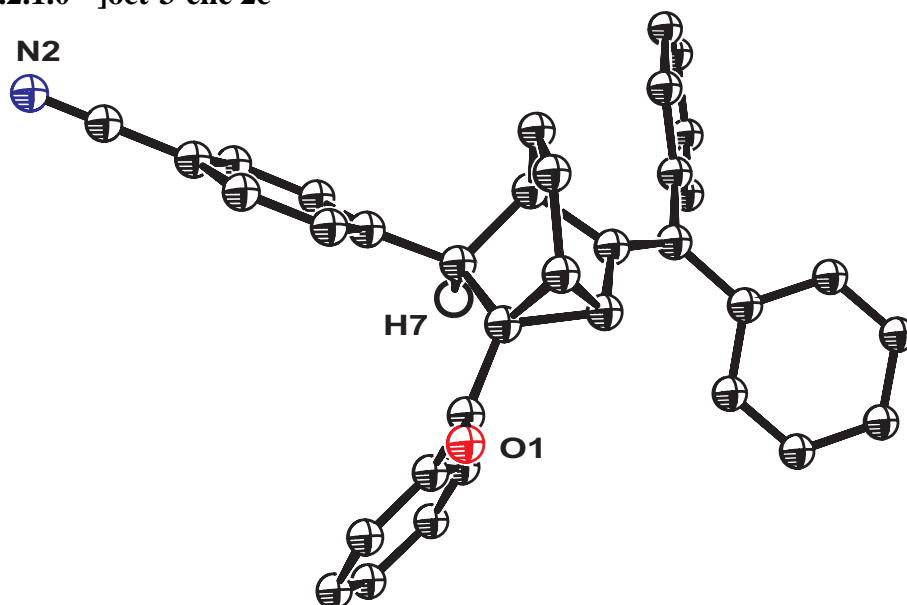

| ATOM | X           | Y           | Z           |
|------|-------------|-------------|-------------|
| O    | -1.90279100 | 2.68699600  | -2.10209700 |
| N    | -7.44452300 | -3.05609900 | 0.34725100  |
| C    | -0.35909200 | 0.29527400  | -2.48906600 |
| H    | -0.52320900 | 1.01612000  | -3.29529300 |
| C    | -0.79663100 | 0.80820300  | -1.11092300 |
| C    | -1.06265700 | -0.29986100 | -0.07934700 |
| H    | -0.80664900 | 0.07751900  | 0.92663900  |
| C    | 0.07523400  | -1.35686300 | -0.44442100 |
| H    | 0.23574300  | -2.08138300 | 0.36606900  |
| C    | 1.26566900  | -0.41401100 | -0.66577300 |
| C    | 0.71624500  | 0.71509200  | -1.45581400 |
| H    | 1.30315100  | 1.60741100  | -1.68151700 |
| C    | -0.49068200 | -1.15245800 | -2.78823800 |
| H    | -0.75653700 | -1.47337000 | -3.80039200 |
| C    | -0.26844800 | -2.01100500 | -1.76803000 |
| H    | -0.35144400 | -3.09819100 | -1.85972600 |
| C    | -1.48321000 | 2.15503600  | -1.06395400 |
| C    | -1.64400800 | 2.85900800  | 0.25420400  |
| C    | -2.70995200 | 3.77602100  | 0.39499800  |
| H    | -3.39209700 | 3.91525500  | -0.44924100 |
| C    | -2.88260400 | 4.48456000  | 1.59109900  |
| H    | -3.72179800 | 5.17986200  | 1.69674000  |
| C    | -1.97630900 | 4.30718700  | 2.65310600  |
| H    | -2.10771400 | 4.86623900  | 3.58550200  |
| C    | -0.89822600 | 3.41601300  | 2.51410800  |
| H    | -0.18092000 | 3.28901400  | 3.33163700  |
| C    | -0.73828200 | 2.68775600  | 1.32504300  |
| H    | 0.11295500  | 2.00748500  | 1.21834200  |
| C    | -2.46786300 | -0.86534800 | -0.01632000 |
| C    | -3.40016500 | -0.71454900 | -1.06496900 |
| H    | -3.12473600 | -0.14789700 | -1.95896400 |

|   |             |             |             |
|---|-------------|-------------|-------------|
| C | -4.68205600 | -1.27232800 | -0.97694800 |
| H | -5.39769000 | -1.14532300 | -1.79438800 |
| C | -5.05872900 | -2.00348200 | 0.17331000  |
| C | -4.13506700 | -2.15630700 | 1.23554000  |
| H | -4.42692100 | -2.71278900 | 2.13083700  |
| C | -2.86235100 | -1.58680400 | 1.13335200  |
| H | -2.15723000 | -1.70120300 | 1.96505400  |
| C | -6.36980500 | -2.58032700 | 0.26834000  |
| C | 2.53931900  | -0.56207600 | -0.18734800 |
| C | 2.97660700  | -1.79953500 | 0.52788400  |
| C | 3.71135600  | -1.69796700 | 1.73452800  |
| H | 3.95226900  | -0.70556000 | 2.13046500  |
| C | 4.12171000  | -2.84569600 | 2.42803400  |
| H | 4.67858100  | -2.74248200 | 3.36553000  |
| C | 3.82488300  | -4.12388800 | 1.92112200  |
| H | 4.15278200  | -5.02001900 | 2.45813600  |
| C | 3.11810000  | -4.24176100 | 0.71264900  |
| H | 2.90131300  | -5.23191100 | 0.29742000  |
| C | 2.70044900  | -3.09205200 | 0.02185000  |
| H | 2.18114500  | -3.18878100 | -0.93730800 |
| C | 3.58150500  | 0.49977000  | -0.36028900 |
| C | 3.35078400  | 1.84695400  | 0.00283600  |
| H | 2.39008400  | 2.12651800  | 0.44784300  |
| C | 4.34410500  | 2.82463400  | -0.17194200 |
| H | 4.14258100  | 3.86023700  | 0.12222700  |
| C | 5.59365400  | 2.47349600  | -0.70940000 |
| H | 6.36893700  | 3.23454100  | -0.84585100 |
| C | 5.84436900  | 1.13499100  | -1.06055600 |
| H | 6.81674000  | 0.84934200  | -1.47583200 |
| C | 4.85345600  | 0.15877400  | -0.87981100 |
| H | 5.05678700  | -0.88262500 | -1.15103700 |

Energy RMP2 = -1475.0520786 Hartree

**Triphenylmethyl enone 6c**

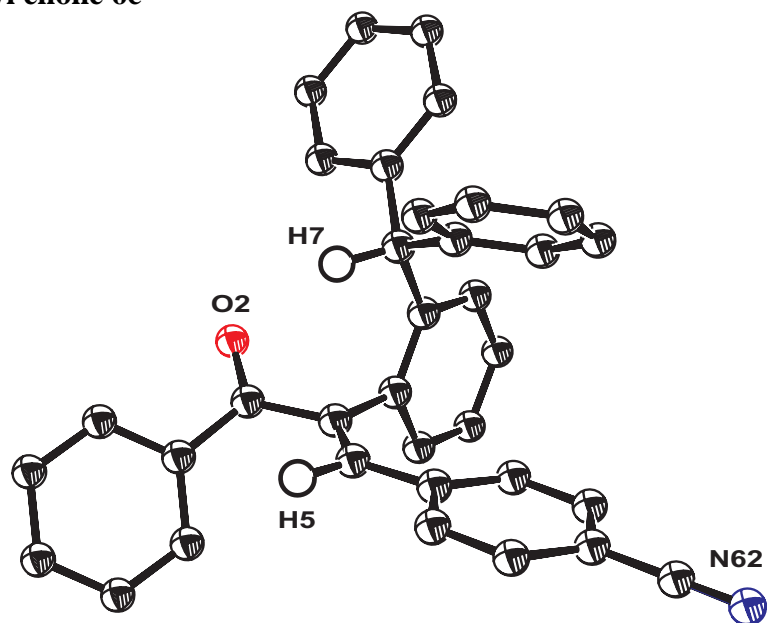

| ATOM | X           | Y           | Z           |
|------|-------------|-------------|-------------|
| C    | -0.24331500 | 2.61180000  | 0.13759900  |
| O    | -1.48291500 | 2.69053800  | 0.15543000  |
| C    | 0.43437900  | 1.32457700  | 0.54061000  |
| C    | 1.61875100  | 0.99293200  | -0.06451500 |
| H    | 1.99765200  | 1.72471600  | -0.79013900 |
| C    | -1.81181400 | -0.56137900 | -0.23804800 |
| H    | -1.56528400 | 0.38220500  | -0.75575400 |
| C    | 0.56902400  | 3.80775000  | -0.28574700 |
| C    | 1.82514800  | 4.11955700  | 0.28256200  |
| H    | 2.26287200  | 3.45564600  | 1.03457600  |
| C    | 2.49787800  | 5.29588300  | -0.08534900 |
| H    | 3.46174300  | 5.53762100  | 0.37454000  |
| C    | 1.93391600  | 6.16129900  | -1.03797500 |
| H    | 2.46390600  | 7.07353000  | -1.33146000 |
| C    | 0.68222400  | 5.85927900  | -1.60676200 |
| H    | 0.23852600  | 6.53449300  | -2.34583600 |
| C    | -0.00262200 | 4.69944800  | -1.22193600 |
| H    | -0.98872200 | 4.46313300  | -1.63356300 |
| C    | -0.29477300 | 0.49618700  | 1.55770800  |
| C    | -1.36361700 | -0.37732200 | 1.21979900  |
| C    | -2.00163200 | -1.08568700 | 2.26022800  |
| H    | -2.84383500 | -1.74003300 | 2.01083300  |
| C    | -1.60403600 | -0.94952500 | 3.59888700  |
| H    | -2.12187600 | -1.51408800 | 4.38140700  |
| C    | -0.55824200 | -0.07332100 | 3.92985200  |
| H    | -0.24834200 | 0.05793000  | 4.97171700  |
| C    | 0.08200300  | 0.64778400  | 2.91142400  |
| H    | 0.89375400  | 1.34066400  | 3.16041400  |
| C    | -3.34144200 | -0.70669300 | -0.35083500 |
| C    | -3.97395400 | -1.92349600 | -0.67146300 |

|   |             |             |             |
|---|-------------|-------------|-------------|
| H | -3.36967400 | -2.81283900 | -0.87738000 |
| C | -5.37712100 | -2.00591100 | -0.74390900 |
| H | -5.84994500 | -2.96151700 | -0.99588700 |
| C | -6.16643000 | -0.87091600 | -0.50136300 |
| H | -7.25825800 | -0.93407900 | -0.56083000 |
| C | -5.54230500 | 0.35048900  | -0.18756600 |
| H | -6.14725800 | 1.24505300  | -0.00302100 |
| C | -4.14376300 | 0.43209600  | -0.11289700 |
| H | -3.65665500 | 1.38238400  | 0.13284100  |
| C | -1.05033100 | -1.67125900 | -0.97368100 |
| C | -0.75944200 | -1.50507100 | -2.34489400 |
| H | -1.05674000 | -0.57534800 | -2.84474800 |
| C | -0.10611400 | -2.51051900 | -3.07482800 |
| H | 0.11181900  | -2.35697700 | -4.13732200 |
| C | 0.26830600  | -3.70966000 | -2.44351300 |
| H | 0.78038800  | -4.49539000 | -3.00873000 |
| C | -0.01626000 | -3.88893400 | -1.07993500 |
| H | 0.27237700  | -4.81848100 | -0.57722600 |
| C | -0.66669700 | -2.87694500 | -0.35171800 |
| H | -0.87510000 | -3.02687800 | 0.71323300  |
| C | 2.48553500  | -0.18510100 | 0.05362300  |
| C | 2.30503100  | -1.25026900 | 0.97507400  |
| H | 1.45256000  | -1.24314700 | 1.65584300  |
| C | 3.20988500  | -2.31194800 | 1.03114700  |
| H | 3.05990200  | -3.12399200 | 1.74822100  |
| C | 4.32607100  | -2.34936800 | 0.16027500  |
| C | 4.52055900  | -1.29948400 | -0.76862300 |
| H | 5.38011300  | -1.32426000 | -1.44422800 |
| C | 3.61287400  | -0.24005700 | -0.81037000 |
| H | 3.77102700  | 0.57152600  | -1.52928000 |
| C | 5.25285300  | -3.44279400 | 0.21954300  |
| N | 6.01360000  | -4.34095700 | 0.26770200  |

Energy RMP2 = -1475.0902385 Hartree

Indane 3c

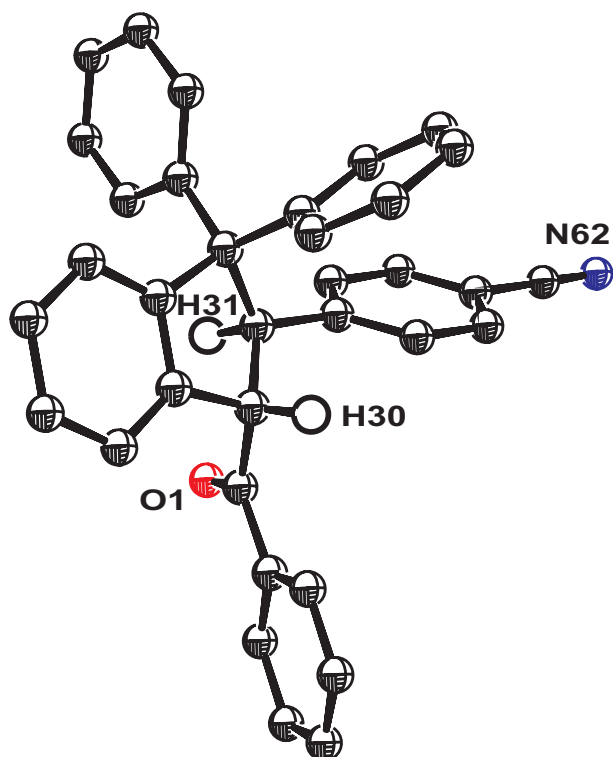

| ATOM | X           | Y           | Z           |
|------|-------------|-------------|-------------|
| O    | 2.15237000  | 0.05823200  | -2.26728300 |
| C    | 2.38762100  | -0.09936500 | -1.06403800 |
| C    | 1.24443300  | -0.47243300 | -0.09797300 |
| C    | -0.13530300 | 0.02614600  | -0.60983100 |
| C    | -1.20270100 | -0.97295400 | 0.05659700  |
| C    | 1.02054500  | -1.97914100 | 0.01759700  |
| C    | 1.96303300  | -3.01834100 | 0.05754000  |
| C    | 1.50819000  | -4.34585100 | 0.16822000  |
| C    | 0.13103300  | -4.62519300 | 0.23679900  |
| C    | -0.81070000 | -3.58041500 | 0.19670100  |
| C    | -0.35875300 | -2.25767100 | 0.08558900  |
| C    | 3.78596400  | 0.04618500  | -0.53442500 |
| C    | 4.79955800  | 0.43086000  | -1.44384500 |
| C    | 6.12219700  | 0.58202200  | -1.01280200 |
| C    | 6.45559000  | 0.34586900  | 0.33482400  |
| C    | 5.45927200  | -0.04172300 | 1.24672200  |
| C    | 4.13078300  | -0.18798200 | 0.81694400  |
| C    | -1.54927600 | -0.49871400 | 1.48875400  |
| C    | -1.01019100 | -1.11782600 | 2.63604500  |
| C    | -1.30691600 | -0.64354700 | 3.92747800  |
| C    | -2.15475700 | 0.46085800  | 4.09985100  |
| C    | -2.70291800 | 1.08782500  | 2.96708600  |
| C    | -2.39970800 | 0.61608100  | 1.68106200  |
| C    | -2.46334300 | -1.19765800 | -0.81440700 |
| C    | -3.73156600 | -1.41894600 | -0.23345000 |
| C    | -4.85701600 | -1.71455500 | -1.02284800 |
| C    | -4.74237800 | -1.80339500 | -2.41815700 |



|   |             |             |             |
|---|-------------|-------------|-------------|
| C | -3.48334400 | -1.61262600 | -3.01161900 |
| C | -2.36140300 | -1.32296300 | -2.21943400 |
| H | 1.45945200  | -0.06432300 | 0.90741000  |
| H | -0.12462200 | -0.20962300 | -1.68676200 |
| H | 3.03577100  | -2.80872800 | -0.00899300 |
| H | 2.23295900  | -5.16644500 | 0.18916100  |
| H | -0.21155800 | -5.66252800 | 0.31231400  |
| H | -1.88386900 | -3.79507400 | 0.24064700  |
| H | 4.51615000  | 0.60629300  | -2.48611100 |
| H | 6.89756800  | 0.88417800  | -1.72437800 |
| H | 7.49051100  | 0.46379300  | 0.67292000  |
| H | 5.71572800  | -0.22909600 | 2.29446800  |
| H | 3.36959800  | -0.49636300 | 1.54018700  |
| H | -0.35853400 | -1.98999600 | 2.52717600  |
| H | -0.87609700 | -1.14914300 | 4.79853000  |
| H | -2.39089100 | 0.82788000  | 5.10419800  |
| H | -3.36794200 | 1.95038700  | 3.08214200  |
| H | -2.84190400 | 1.11312900  | 0.81219600  |
| H | -3.84777000 | -1.35960800 | 0.85226400  |
| H | -5.82579200 | -1.87545600 | -0.53766000 |
| H | -5.61869200 | -2.02683400 | -3.03542800 |
| H | -3.36765400 | -1.69585300 | -4.09762700 |
| H | -1.39134200 | -1.21730300 | -2.71557400 |
| C | -0.38740900 | 1.51820500  | -0.50131900 |
| C | -1.12302600 | 2.16402400  | -1.52117900 |
| C | 0.08849200  | 2.30533200  | 0.57062400  |
| C | -1.38680300 | 3.53718700  | -1.47673600 |
| H | -1.49426700 | 1.57487500  | -2.36594700 |
| C | -0.15485000 | 3.68250800  | 0.62780800  |
| H | 0.65225800  | 1.84088700  | 1.38523600  |
| C | -0.90005100 | 4.31128300  | -0.39687100 |
| H | -1.95725900 | 4.01986100  | -2.27549400 |
| H | 0.22324700  | 4.27742800  | 1.46417600  |
| C | -1.15544000 | 5.72290000  | -0.34305100 |
| N | -1.36673700 | 6.88084300  | -0.29661700 |

Energy RMP2 = -1475.1170548 Hartree
